23 <sup>g</sup>Instituto de Química, Departamento de Química Orgânica, Universidade de  
24 Campinas, Campinas, São Paulo, Brazil

25 <sup>h</sup>Molecular Mycology Unit, Institut Pasteur, CNRS, UMR2000, Paris, France

26 <sup>i</sup>Life and Health Sciences Research Institute (ICVS), School of Medicine,  
27 University of Minho, Braga, Portugal

28 <sup>j</sup>ICVS/3B's - PT Government Associate Laboratory, Guimarães/Braga, Portugal

29

30 **Running title:** *Aspergillus fumigatus* acetate utilisation

31

32 <sup>#</sup>Address correspondence to LNA Ries, [rieslaure13@gmail.com](mailto:rieslaure13@gmail.com) and GH  
33 Goldman, [ggoldman@usp.br](mailto:ggoldman@usp.br)

34 <sup>\*</sup>Present address: MRC Centre for Medical Mycology, University of Exeter,  
35 Exeter, United Kingdom

36

37

38

39

40

41

42

43

44 **Abstract**

45 *Aspergillus fumigatus* is a major opportunistic fungal pathogen of  
46 immunocompromised and immunocompetent hosts. To successfully establish  
47 an infection, *A. fumigatus* needs to use host carbon sources, such as acetate,  
48 present in the body fluids and peripheral tissues. However, utilisation of acetate  
49 as a carbon source by fungi in the context of infection has not been  
50 investigated. This work shows that acetate is metabolised via different pathways  
51 in *A. fumigatus* and that acetate utilisation is under the regulatory control of a  
52 transcription factor (TF), FacB. *A. fumigatus* acetate utilisation is subject to  
53 carbon catabolite repression (CCR), although this is only partially dependent on  
54 the TF and main regulator of CCR CreA. The available extracellular carbon  
55 source, in this case glucose and acetate, significantly affected *A. fumigatus*  
56 virulence traits such as secondary metabolite secretion and cell wall  
57 composition, with the latter having consequences for resistance to oxidative  
58 stress, to anti-fungal drugs and to human neutrophil-mediated killing.  
59 Furthermore, deletion of *facB* significantly impaired the *in vivo* virulence of *A.*  
60 *fumigatus* in both insect and mammalian models of invasive aspergillosis. This  
61 is the first report on acetate utilisation in *A. fumigatus* and this work further  
62 highlights the importance of available host-specific carbon sources in shaping  
63 fungal virulence traits and subsequent disease outcome, and a potential target  
64 for the development of anti-fungal strategies.

65

66

67

## 68 **Importance**

69 *Aspergillus fumigatus* is an opportunistic fungal pathogen in humans. During  
70 infection, *A. fumigatus* is predicted to use host carbon sources, such as acetate,  
71 present in body fluids and peripheral tissues, to sustain growth and promote  
72 colonisation and invasion. This work shows that *A. fumigatus* metabolises  
73 acetate via different pathways, a process that is dependent on the transcription  
74 factor FacB. Furthermore, the type and concentration of the extracellular  
75 available carbon source were determined to shape *A. fumigatus* virulence  
76 determinants such as secondary metabolite secretion and cell wall composition.  
77 Subsequently, interactions with immune cells are altered in a carbon source-  
78 specific manner. FacB is required for *A. fumigatus in vivo* virulence in both  
79 insect and mammalian models of invasive aspergillosis. This is the first report  
80 that characterises acetate utilisation in *A. fumigatus* and highlights the  
81 importance of available host-specific carbon sources in shaping virulence traits  
82 and potentially subsequent disease outcome.

83

84

85

86

87

88

89

90

## 91 **Introduction**

92 *Aspergillus fumigatus* is a saprotrophic filamentous fungus and opportunistic  
93 pathogen of immunocompetent and immunocompromised hosts. Together with  
94 other opportunistic fungal pathogens, such as *Candida albicans* and  
95 *Cryptococcus neoformans*, globally they kill in excess of 1.5 million people a  
96 year(1). The severity of the diseases related to *A. fumigatus* depend on pre-  
97 existing infections as well as on the status of the host immune system (2). To  
98 successfully colonise and survive within the human host, *A. fumigatus* needs to  
99 acquire and metabolise nutrients. Essential nutrients include minerals such as  
100 iron, copper and zinc, which are required in small amounts; while carbon and  
101 nitrogen, the main energy sources for sustaining biosynthetic processes, must  
102 be obtained in large quantities(3). Iron, zinc and copper acquisition and  
103 metabolism have been studied in *A. fumigatus* in the context of virulence(4–6),  
104 whereas less is known about carbon source acquisition and metabolism in this  
105 fungus during infection. Studies have inferred that glucose, lactate and acetate  
106 are carbon sources available to fungi *in vivo* with their availability and  
107 concentration depending on the host niche (7, 8). Whereas glucose utilisation  
108 has been shown to be important for *A. fumigatus* disease progression (9), the  
109 utilisation of the physiologically relevant short chain fatty acids (SCFAs) lactate  
110 and acetate remain unexplored in this fungus. Indeed, acetate was detected in  
111 bronchoalveolar lavage (BAL) samples of healthy and immunosuppressed mice,  
112 suggesting the presence of this carbon source, independent of the underlying  
113 immune condition, at the *A. fumigatus* primary site of infection. Our work  
114 therefore aimed at characterising *A. fumigatus* acetate utilisation and its  
115 relevance for virulence.

116 In the human body, acetate is present in the blood plasma at concentrations  
117 ranging from 0.074 to 0.621 mM depending on the type of artery, diet and  
118 alcohol intake(10). Peripheral tissues can consume acetate from the blood  
119 stream and oxidise it(10). The main producer of plasma acetate is the  
120 gastrointestinal (GI) tract-resident microbiome, with the majority of GI-resident  
121 bacterial species being capable of producing acetate(10). Furthermore, acetate  
122 has immunoregulatory properties. Acetate is an agonist for the G-protein  
123 coupled receptors (GPCRs) FFA2, FFA3 and GPR109A, which are expressed  
124 in a number of immune cells, thus affecting the production of cytokines, the  
125 regulation of downstream anti- and pro-inflammatory responses, and  
126 recruitment of immune cells(11). Acetate is likely important during invasive  
127 fungal infections as it can regulate immunity at distal sites, including the lungs.

128 As mentioned above, small quantities of acetate were detected in healthy and  
129 immunosuppressed mice (8). The lungs are lined with a mucosa and contain a  
130 microbiome that has been shown to suffer alterations in the presence of  
131 disease(12). The lung microbiome, just like the gut microbiome, may contribute  
132 to the production and secretion of SCFAs(13). Studies investigating the  
133 production of SCFAs and other molecules by the lung microbiota are non-  
134 existent, probably due to the lungs having been thought of as sterile until a few  
135 years ago(12).

136 Our understanding of the utilization of potential food sources during infection  
137 mainly relies on *in vitro* transcriptional studies(14–16). Despite several studies  
138 having investigated *A. fumigatus* gene expression during *in vivo* infection of  
139 chemotherapeutic mice models of invasive aspergillosis, none of these studies  
140 have characterised the modulation of genes encoding components required for

141 carbon source utilisation (17–20). The genome of *A. fumigatus* encodes the  
142 acetyl-CoA synthetases (ACS) *FacA* (Afu4g11080) and *PcsA* (Afu2g07780),  
143 with *facA* shown to be up-regulated in conidia exposed to neutrophils, and the  
144 corresponding protein induced by heat shock and repressed during hypoxic  
145 conditions(14, 21, 22). In *A. fumigatus*, the homologue of the *A. nidulans*  
146 transcription factor (TF)-encoding *facB* gene is up-regulated when conidia are  
147 exposed to neutrophils(14). Furthermore, *A. fumigatus* conidia which were  
148 exposed to human neutrophils from healthy or CGD (chronic granulomatous  
149 disease) donors, showed an up-regulation of genes encoding enzymes involved  
150 in the glyoxylate cycle, gluconeogenesis, peroxisome function and fatty acid  
151 degradation(14), suggesting an induction of metabolic pathways that are  
152 required for the utilisation of alternative, non-preferred carbon sources.  
153 Together, the aforementioned studies suggest that the utilisation of alternative  
154 carbon sources such as SCFAs is important for *A. fumigatus* infection.

155 Acetate utilisation has been investigated in detail in the model fungus *A.*  
156 *nidulans*. In *A. nidulans*, acetate was shown to be transported by the short-  
157 chain carboxylate transporters *AcpA* and *AcpB*, with the former being  
158 expressed in germinating conidia and young germlings, and the latter  
159 expressed in mycelia(23). The genome of *A. fumigatus* encodes one  
160 homologue of both *acpA* and *acpB* (Afu2g04080), which remains  
161 uncharacterised. Once internalised, acetate is converted by ACS to acetyl-CoA,  
162 which subsequently is transported into the mitochondria where it enters the TCA  
163 cycle for the synthesis of ATP molecules(24). Furthermore, acetate, in the  
164 acetyl-coA form, is oxidised via the glyoxylate cycle and required during  
165 gluconeogenesis(24). In *A. nidulans*, acetate utilisation is under the control of

166 the TF FacB, which is transcriptionally induced in the presence of acetate(25).  
167 FacB controls the expression of the ACS FacA, of the carnitine  
168 acetyltransferases FacC, AcuH and AcuJ, of the succinate/fumarate antiporter  
169 AcuL and of the glyoxylate cycle malate synthase AcuE(25, 26). The genome of  
170 *A. fumigatus* encodes homologues of the *A. nidulans* components required for  
171 acetate metabolism, although they have not been investigated until now. This  
172 work characterised the utilisation of acetate in *A. fumigatus* and highlights the  
173 importance of the type of available extracellular carbon source in shaping fungal  
174 virulence determinants.

175

## 176 **Results**

177 **Acetate is metabolised via the glyoxylate and TCA (tricarboxylic acid)**  
178 **cycles and a precursor for different metabolites.** To investigate acetate  
179 metabolism in *A. fumigatus*, the metabolic fate of acetate was traced by  
180 incubating fungal mycelia with  $^{13}\text{C}_2$ -labelled acetate. The *A. fumigatus* wild-type  
181 (WT) strain CEA17 was grown for 16 h in peptone rich-minimal medium (MM)  
182 before undergoing 4 h of carbon starvation in MM. Subsequently,  $^{13}\text{C}_2$ -labelled  
183 acetate was added to the cultures for 5 and 15 min before mycelia were  
184 separated from the culture medium and immediately snap-frozen in liquid  
185 nitrogen. Following metabolite extraction, 1D  $^1\text{H}$  and 2D  $^1\text{H}$ - $^{13}\text{C}$  HSQC  
186 (heteronuclear single quantum coherence) NMR (nuclear magnetic resonance)  
187 spectra were recorded for each sample. The uptake of  $^{13}\text{C}_2$ -acetate by *A.*  
188 *fumigatus* was observed through significant increases in carbon satellite peaks  
189 (reflecting  $^1\text{H}$ - $^{13}\text{C}$  coupling) on both sides of the central acetate singlet ( $\delta$  1.92



190 ppm) in  $^1\text{H}$  spectra of fungal cell extracts (Figure 1A, top). To identify  
191 metabolites that were directly derived from  $^{13}\text{C}_2$ -labelled acetate and determine  
192 their fractional enrichment,  $^1\text{H}$ - $^{13}\text{C}$  HSQC spectra from 5 and 15 min samples  
193 were compared to spectra of control cells (4h starvation, no labelling). The  
194 extent of  $^{13}\text{C}$ -incorporation levels was obtained for each metabolite by dividing  
195 the 2D peak intensity in  $^{13}\text{C}$ -enriched samples by the peak intensity in the  
196 matched control sample (with 1.1% natural abundance in  $^{13}\text{C}$  levels). Results  
197 showed that labelled  $^{13}\text{C}$  from acetate was incorporated into the amino acids  
198 alanine at carbon-2 and carbon-3 (C2 and C3), aspartate at C2 and C3 and  
199 glutamate at C2, C3 and C4, the glyoxylate/TCA cycle intermediates citrate at  
200 C2, malate at C2 and C3 and succinate at C2 as well as in the glycolipid and  
201 glycoprotein compound N-acetylneuraminate at C11 (Figure 1A, bottom).

202 These results indicate that acetate is taken up and metabolised via the  
203 glyoxylate and TCA cycles in *A. fumigatus*, which is in agreement with studies in  
204 *S. cerevisiae* (27) and *A. nidulans* (24) and in the line with the metabolism of  
205 two carbon compounds as the sole carbon source. Indeed,  $^{13}\text{C}$  was  
206 incorporated into the amino acid and Krebs cycle intermediate aspartate(28) as  
207 well as the amino acids alanine and glutamate. The TCA cycle intermediate  
208 oxaloacetate is converted into phosphor-enol-pyruvate (gluconeogenesis),  
209 which in turn is a precursor for alanine in a two-step process that involves  
210 glutamate. Furthermore,  $^{13}\text{C}$  was also enriched in other cellular compounds  
211 such as N-acetylneuraminate, which is a sialic acid that is present on cell  
212 surface acidic glycoconjugates, and which has been shown to contribute to the  
213 phagocytic properties of cells of opportunistic fungal pathogens such as  
214 *Cryptococcus neoformans* (29), *Candida albicans* (30) and *A. fumigatus* (31).

215 Hence, this analysis showed that acetate is metabolised by *A. fumigatus*  
216 through multiple pathways.

217 **The transcription factor (TF) FacB is essential for *A. fumigatus* growth in**  
218 **the presence of acetate and ethanol as the sole carbon sources.** To

219 determine whether acetate utilisation is controlled by a TF in *A. fumigatus*, as  
220 was previously described for *A. nidulans* (25), a TF deletion library (32) was

221 screened for reduced growth on plates containing MM supplemented with 0.5%  
222 (w/v) acetate (AMM) as the sole carbon source. Several strains were identified,

223 and subsequent confirmation growth experiments, in both solid (radial growth)  
224 and liquid (dry weight) AMM, resulted in the selection of 5 strains that had

225 reduced growth in acetate, but presented no growth defects in glucose-rich MM  
226 (GMM) (Supplementary Figure 1A-C at 10.6084/m9.figshare.14740482, Figure

227 1B-D). These strains were deleted for genes *acuK* (Afu2g05830), *acuM*  
228 (Afu2g12330), *facB* (Afu1g13510), *farA* (Afu4g03960) and *mtfA* (Afu6g02690)

229 (Supplementary Figure 1 at 10.6084/m9.figshare.14740482, Figure 1B-D).  
230 *AcuM*, *AcuK* and *MtfA* have been characterised in *A. fumigatus* and have been

231 shown to be important for alternative carbon source utilisation and virulence(33,  
232 34). Furthermore, *farA* was shown to be important for fatty acid utilisation and

233 was up-regulated in fungal cells exposed to human neutrophils(14). In contrast,  
234 *A. fumigatus* *FacB*, which is the homologue of *A. nidulans* *FacB*, remains

235 uncharacterised. We therefore aimed at further deciphering the role of the TF  
236 *FacB* in *A. fumigatus* acetate utilisation and virulence. *FacB* was also essential

237 for growth in medium with ethanol as the sole carbon source but not for growth  
238 in the presence of different fatty acids (Supplementary Figure 1D at

239 10.6084/m9.figshare.14740482). Ethanol and acetate are two carbon

240 compounds that require identical metabolic pathways with ethanol being  
241 converted to acetate via the metabolic intermediate acetaldehyde(35). Re-  
242 introduction of *A. fumigatus facB* in the  $\Delta facB$  background strain at the *facB*  
243 locus through homologous recombination restored growth in acetate (Figure 1B-  
244 D, Supplementary Figure 1D at 10.6084/m9.figshare.14740482), confirming that  
245 the FacB-encoding gene is essential for *A. fumigatus* growth on two carbon  
246 compounds.

247 **FacB controls acetate utilisation through regulating genes encoding**  
248 **enzymes required for acetate metabolism.** To gain further insight into *A.*  
249 *fumigatus* acetate metabolism and to describe a role of FacB in the control of  
250 acetate utilisation, the transcriptional response of the wild-type (WT) and  $\Delta facB$   
251 strains was assessed by RNA-sequencing (RNA-seq), when grown for 24 h in  
252 fructose-rich (control) MM and after transfer for 0.5 h (short incubation) or 6 h  
253 (long incubation) to MM supplemented with 0.1% w/v (low concentration) or 1%  
254 w/v (high concentration) acetate. We chose different concentrations of acetate  
255 and time points in order to decipher the transcriptional response in the presence  
256 of abundant and limiting carbon source concentrations after short and  
257 prolonged exposure. The number of significantly differentially expressed genes  
258 (DEGs) were defined as having a  $-1 < \log_2FC$  (fold change)  $< 1$  and an  
259 adjusted  $p$ -value  $< 0.05$  (Supplementary File 1 at  
260 10.6084/m9.figshare.14740482, Table 1). Two comparisons were carried out: i)  
261 gene expression in the presence of the four different acetate conditions against  
262 gene expression in the control (fructose) condition in the WT strain; and ii) gene  
263 expression in the WT strain against gene expression in the  $\Delta facB$  strain in the  
264 presence of the different acetate conditions (Table 1, 8 comparisons in total).

265 Gene ontology (GO) and Functional Categorisation (FunCat) analyses could not  
266 be performed for many of the comparisons shown in Table 1, probably due to a  
267 low number of DEGs in some conditions (Table 1). DEGs were therefore  
268 manually inspected and divided into the following categories: a) amino acid,  
269 protein and nitrogen (urea, nitrate, ammonium) metabolism (degradation and  
270 biosynthesis); b) carbohydrate and lipid metabolism, including genes encoding  
271 enzymes required for lipid, fatty acid and acetate degradation, CAZymes  
272 (carbohydrate active enzymes) and the metabolism of other sugars; c) cell  
273 signalling (protein kinases, phosphatases, regulators of G-protein signalling and  
274 G-protein coupled receptors – GPCRs); d) cell membrane and cell wall  
275 (ergosterol, chitin and glucan biosynthesis/degradation); e) miscellaneous  
276 (genes encoding enzymes with diverse functions that do not fit into the other  
277 categories); f) oxidation/reduction and respiration (oxidoreductases,  
278 monooxygenases and respiratory chain enzymes); g) secondary metabolism; h)  
279 transcription factors; i) transporters (sugars, amino acids, ammonium, nitrate,  
280 ions, metals and multidrug); j) unknown (gene encoding proteins with  
281 unknown/uncharacterised functions) and k) putative virulence factors (proteases  
282 and proteins important for adhesion and interaction with the extracellular  
283 environment) (Supplementary Files 2 and 3 at [10.6084/m9.figshare.14740482](https://doi.org/10.6084/m9.figshare.14740482);  
284 Supplementary Figure 2 at [10.6084/m9.figshare.14740482](https://doi.org/10.6084/m9.figshare.14740482)). In the WT strain,  
285 this categorisation was carried out for all DEGs with a  $-3 < \log_2FC < 3$  in order  
286 to identify genes with the highest differential expression pattern. For  
287 comparisons between the WT and  $\Delta facB$  strains, categorisation was carried out  
288 for all DEGs with a  $-1.5 < \log_2FC < 1.5$  in order to include as many DEGs as  
289 possible.

290 The majority of DEGs (34 – 46%) encoded proteins of unknown function,  
291 whereas genes encoding enzymes required for carbohydrate and carbon  
292 compound (CC) metabolism, oxidation/reduction and respiration, secondary  
293 metabolism and transporters constituted 38 – 48% of all DEGs (Supplementary  
294 Figure 2 at 10.6084/m9.figshare.14740482) suggesting the presence of acetate  
295 influences the regulation of these processes. No particular enrichment for any of  
296 the aforementioned categories was found for the here studied conditions  
297 (Supplementary Figure 2 at 10.6084/m9.figshare.14740482). There were  
298 differences though in the type of secondary metabolites (SMs), transporters as  
299 well as respiratory and carbon source metabolism encoded by the DEGs  
300 (Supplementary Figure 2 at 10.6084/m9.figshare.14740482).

301 To further unravel the role of FacB in acetate utilisation, we focused on DEGs  
302 that encode enzymes important for acetate metabolism. In the wild-type strain,  
303 genes encoding the ACS FacA (but not the ACS PcsA), a carnitine acetyl  
304 transferase (Afu1g12340), a mitochondrial carnitine:acyl carnitine carrier  
305 (Afu6g14100), the isocitrate lyase (ICL) *AcuD* (*acuD*, glyoxylate cycle) and the  
306 malate synthase *AcuE* (*acuE*, glyoxylate cycle) were highly expressed in all  
307 acetate conditions; in contrast, these genes were repressed in the  $\Delta$ *facB* strain  
308 (Figure 2A). The exception was in the presence of 6 h in 0.1% w/v acetate,  
309 where these genes were not expressed in the WT strain but they were induced  
310 in the *facB* deletion strain (Figure 2A). This is likely due to carbon starvation,  
311 which would occur in these conditions. Assessment of the expression of *facA*,  
312 Afu1g12340, Afu6g14100 and *acuD* by qRT (real-time reverse transcriptase)-  
313 PCR in the same conditions confirmed the RNA-seq data (Figure 2B, 2C).

314 To further confirm the transcriptional data, we assayed the activities of ACS and  
315 ICL (isocitrate lyase) in the WT,  $\Delta facB$  and  $\Delta facB::facB^+$  strains when grown in  
316 the presence of 1% w/v acetate for 0.5 h, 6 h and 22 h. In agreement with the  
317 RNA-seq data, ACS and ICL activities were induced in the presence of acetate  
318 in the WT and  $\Delta facB::facB^+$  strains. No significant difference in ACS and ICL  
319 activities were observed between the WT and  $\Delta facB::facB^+$  strains, whereas  
320 these enzyme activities were significantly reduced in the  $\Delta facB$  strain in all  
321 tested conditions (Figure 2D). ICL activity was completely dependent on FacB  
322 with the loss of *facB* resulting in no enzyme activity (Figure 2D). In contrast,  
323 ACS activity was reduced ~20-30% in the  $\Delta facB$  strain when compared to the  
324 WT and  $\Delta facB::facB^+$  strains (Figure 2D). The observed ACS activity is likely  
325 due to the activity of the second *A. fumigatus* ACS PcsA. Our RNA-seq data  
326 shows that *pcsA* is not under the regulatory control of FacB in the here tested  
327 conditions, whereas the expression of the single ICL-encoding gene *acuD*, is  
328 regulated by FacB (Figure 2A). These results suggest that FacB controls  
329 acetate utilisation through regulating genes encoding enzymes required for  
330 acetate metabolism.

331 **Acetate metabolism is subject to carbon catabolite repression (CCR).** In *A.*  
332 *fumigatus*, CCR is a cellular process which directs primary metabolism to the  
333 utilisation of preferred carbon sources (glucose) and results in the repression of  
334 genes required for the utilisation of alternative carbon sources (acetate)(36).  
335 The opportunistic yeast pathogen *C. albicans* is able to simultaneously use  
336 glucose and lactate, due to the loss of an ubiquitination site on ICL(37). This  
337 increased metabolic flexibility plays a role in the adaptation of *C. albicans* to the  
338 host environment with the addition of an ubiquitination site to *C. albicans* ICL

339 resulting in decreased resistance to phagocytosis by macrophages, decreased  
340 fungal burden in the GI tract, and decreased dissemination to the kidneys(38).  
341 To determine whether *A. fumigatus* is able to use glucose and acetate  
342 simultaneously, transcriptional and enzymatic studies were performed in the WT  
343 and  $\Delta facB$  strains in the presence of equimolar concentrations of glucose and  
344 acetate. We also included a strain deleted for the TF CreA, which is a  
345 transcriptional regulator of CCR (36). Strains were grown in the presence of  
346 12.2 mM (0.1% w/v) and 122 mM (1% w/v) acetate without or with equimolar  
347 concentrations of glucose for 0.5 h, before expression of genes *facB*, *facA*,  
348 *Afu1g12340*, *Afu6g14100* and *acuD* were determined by qRT-PCR (Figure 3A-  
349 B). The presence of the different concentrations of glucose caused a significant  
350 down-regulation of all genes, except for *facB* in the presence of 122 mM acetate  
351 and glucose (Figures 3A-B). It is possible that the expression of *facB* is  
352 dependent on the concentration of the externally available carbon source. In  
353 *Aspergillus spp.*, high and low affinity carbon source transporters are expressed  
354 depending on the concentration of the extracellular carbon source (39). A  
355 similar scenario can be envisaged for transcription factors (TFs), especially as  
356 they respond to external stimuli, with some TFs being highly induced under  
357 nutrient limiting conditions and repressed in nutrient sufficient conditions (20).  
358 Alternatively, *Aspergillus* transcription factors are not always regulated at the  
359 transcriptional level as previously shown (40). These results suggest that *A.*  
360 *fumigatus* acetate metabolism is subject to CCR as has been described in *A.*  
361 *nidulans*(25, 26).  
362 In the presence of 12.2 mM acetate, deletion of *creA* caused a significant down-  
363 regulation of *facA*, *Afu6g14100* and *acuD*; whereas in the simultaneous

364 presence of 12.2 mM acetate and glucose, the absence of *creA* significantly  
365 increased *facB* and Afu6g14100 gene expression (Figure 3A). In the presence  
366 of 122 mM acetate, deletion of *creA* significantly reduced Afu1g12340 and  
367 Afu6g14100 gene expression, whereas upon in the presence of glucose, the  
368 expression of all genes, except for *facB*, was increased, although not to WT  
369 levels (Figure 3B). The exception was the expression of *acuD* in the  $\Delta creA$   
370 strain in the presence of 122 mM acetate and glucose, which was similar to the  
371 expression levels of *acuD* in the WT strain in the presence of 122 mM acetate  
372 (Figure 3B). These results suggest that: i) CreA may be involved in the control  
373 of genes required for alternative carbon source utilisation and that ii) acetate  
374 metabolism (with the exception of *acuD*) is partially dependent on CreA-  
375 mediated CCR in a concentration-dependent manner.

376 Next ACS and ICL activities were measured in the presence of 122 mM acetate  
377 and glucose after 0.5 h, 6 h and 22 h. Enzyme activities were lower in the  
378 presence of acetate and glucose (Figure 3C) than in the presence of acetate  
379 only (Figure 2C), supporting the observed transcriptional repression of the  
380 corresponding genes in the presence of glucose. Basal ACS activity was  
381 detected in all conditions (likely due to the presence of the FacB-dependent  
382 ACS FacB and the FacB-independent ACS PcsA) whereas ICL activity was not  
383 detected at 0.5 h and 6 h. This is in agreement with the transcriptional data,  
384 suggesting that ICL activity is completely dependent on FacB for induction  
385 (Figures 2B-C, 3B-C) and CreA for repression (Figure 3B). After 22 h incubation  
386 in both carbon sources, enzyme activities increased, which may be due to low  
387 glucose concentrations (~ 30%) in the culture medium (Figure 3D), making  
388 acetate the predominant available carbon source. Furthermore, significantly



389 more extracellular glucose was present in supernatants of the  $\Delta facB$  strain  
390 (Figure 3D), suggesting that FacB may also be involved in the utilisation of  
391 other carbon sources. Together, these results suggest that genes and enzymes  
392 involved in acetate utilisation are subject to CCR and that their regulation is  
393 partially controlled by CreA.

394 **The extracellular carbon source influences the levels of secreted**  
395 **secondary metabolites (SMs).** The secretion of SMs has been shown to be  
396 essential for *A. fumigatus* proliferation within the natural environment and  
397 mammalian host, for evasion and modulation of the host immune system and  
398 for virulence(41). Our RNA-seq data shows that many DEGs are part of the  
399 fumagillin, pseurotin A, pyomelanin and gliotoxin SM biosynthetic gene clusters  
400 (BGCs) (Supplementary Figure 2 at 10.6084/m9.figshare.14740482, Figure 4A-  
401 B). SM BGCs are mainly expressed in the WT strain in the presence of 1% w/v  
402 acetate or after 6 h incubation in MM supplemented with 0.1% w/v acetate  
403 (Figure 4A-B). In contrast, these DEGs have reduced expression or are  
404 repressed in the in the  $\Delta facB$  strain (Figure 4A-B). Furthermore, the expression  
405 profiles of these genes were often reversed between the WT and  $\Delta facB$  strains  
406 in these conditions, suggesting that the metabolic pathways regulated by FacB  
407 are important for SM gene expression.

408 To determine whether SMs are secreted specifically in the presence of acetate  
409 and dependent on FacB, high performance liquid chromatography (HPLC) was  
410 performed on culture supernatants from the WT and  $\Delta facB$  strains grown for 24  
411 h in fructose-rich MM and after transfer to MM supplemented with 0.1% w/v and  
412 1% w/v acetate for 24 h. This pre-growth in fructose ensured that the starting  
413 biomass was similar for all samples. In addition, SM profiles were examined for

414 the WT strain when grown in the same conditions, with the exception that  
415 acetate was replaced with glucose as the main carbon source. After 24 h, a  
416 total of 18 SMs including the previously characterised(42, 43) fumiquinazolines  
417 A and D, fumitremorgin C, pyripyropene A, pseurotins A and F2, fungisporin  
418 and brevianamide F, were identified in culture supernatants from strains grown  
419 in all conditions (Supplementary Table 2 at 10.6084/m9.figshare.14740482). We  
420 did not detect gliotoxin or pyomelanin in culture supernatants.

421 Subsequently, the concentrations of characterised SMs were quantified to  
422 determine whether the extracellular available carbon source influences the  
423 levels of secreted SMs. In the WT strain, concentrations of all these SMs, with  
424 the exception of fumiquinazoline and fungisporin, were significantly higher in the  
425 presence of 1% w/v glucose than in the presence of 1% w/v acetate (Figure  
426 4C). Similarly, in the presence of 0.1% w/v glucose, secreted levels of  
427 brevianamide F, fumiquinazoline, fumitremorgin C and pseurotin A were  
428 significantly higher when compared to concentrations in the presence of 0.1%  
429 w/v acetate; whereas levels of fumagillin and fungisporin A were significantly  
430 higher in the presence of 0.1% w/v acetate than in the presence of 0.1%  
431 glucose (Figure 4C). Furthermore, differences in levels of secreted SMs were  
432 also seen between the two different concentrations of the same carbon source  
433 (Figure 4C). In addition, deletion of *facB* resulted in a significant decrease in  
434 concentrations of secreted SMs in the presence of different concentrations of  
435 extracellular acetate with the exception of fumagillin (Figure 4C).

436 Together, these results suggest that the concentration and type of available  
437 extracellular carbon source affects the levels of secreted SMs.

438 **The composition of the *A. fumigatus* cell wall is carbon source dependent.**

439 In *A. fumigatus*, the composition of the culture medium influenced cell wall  
440 composition, thus modulating their sensitivity to antifungal agents(44). In  
441 addition, primary carbon metabolism was shown to influence cell wall content  
442 and/or organisation(45). To investigate whether glucose and acetate,  
443 respectively representing preferred and alternative carbon sources would also  
444 influence cell wall composition, we determined the quantities of cell wall  
445 polysaccharides in the *A. fumigatus* WT strain when grown in the presence of  
446 each of these carbon sources.

447 Cell wall alkali-insoluble (AI) and alkali-soluble (AS) fractions were prepared of  
448 WT mycelia grown for 24 h in MM supplemented with 1% w/v glucose or  
449 acetate and analysed by gas-liquid chromatography (Supplementary Figure 3A  
450 at 10.6084/m9.figshare.14740482). Results show that there is a significant  
451 increase in the percentage of the cell wall AI fraction in the presence of acetate  
452 due to increased concentrations of glucose ( $\beta$ -1,3-glucan) and glucosamine  
453 (chitin) (Figures 5A and 5B; Supplementary Figure 3A at  
454 10.6084/m9.figshare.14740482). In contrast, the percentage of cell wall AS  
455 fraction was significantly reduced in the presence of acetate predominantly due  
456 to decreased levels of glucose ( $\alpha$ -1,3-glucan), although significantly decreased  
457 levels of mannose and galactose were also observed (Figure 5A,B;  
458 Supplementary Figure 3A at 10.6084/m9.figshare.14740482). These results  
459 suggest that the type of extracellular carbon source significantly influences *A.*  
460 *fumigatus* cell wall composition and organisation.

461 **Oxidative stress and antifungal drug tolerance are carbon source-**  
462 **dependent.** The *A. fumigatus* cell wall has been shown to play a major role

463 during infection as it represents the main line of defence for the fungus and is  
464 responsible for interacting with and modulating host immune cells as well as for  
465 oxidative stress and antifungal drug resistance(46). The aforementioned results  
466 show that the type of carbon source has an effect on cell wall polysaccharide  
467 concentrations. Subsequently, oxidative stress and antifungal drug resistance  
468 were determined in the *A. fumigatus* WT when grown in the presence of  
469 glucose or acetate.

470 First, the WT strain was grown in the presence of GMM or AMM supplemented  
471 with the oxidative stress-inducing compounds hydrogen peroxide (H<sub>2</sub>O<sub>2</sub>),  
472 menadione and *t*-butyl hydroperoxide, before colony diameters were measured  
473 and the percentage of growth was normalised by the growth in the control, drug-  
474 free condition for each carbon source. Growth was significantly reduced in the  
475 presence of AMM supplemented with the oxidative stress-inducing compounds  
476 when compared to growth in the presence of GMM supplemented with the  
477 oxidative stress-inducing compounds (Figure 5C, Supplementary Figure 3B at  
478 10.6084/m9.figshare.14740482). These results suggest that the presence of  
479 acetate increases sensitivity to oxidative stress in *A. fumigatus*.

480 Next, we determined resistance to antifungal drugs, including different azoles,  
481 amphotericin B and caspofungin, when the WT strain was grown in the  
482 presence of glucose and acetate. We performed MIC (minimal inhibitory  
483 concentration) assays of amphotericin B, voriconazole, itraconazole and  
484 posaconazole when *A. fumigatus* was grown in RPMI medium (standard  
485 reference medium used for MIC assays), GMM and AMM for 72 h. *A. fumigatus*  
486 grown in the presence of AMM, was slightly more susceptible to amphotericin B  
487 than when compared to growth in the presence of RPMI and GMM (Table 2).

488 No difference in susceptibility was observed for the different here tested azoles  
489 when compared to RPMI although reduced growth in the presence of these  
490 azoles was observed when comparing MIC between GMM and AMM (Table 2).  
491 The WT strain was also grown in GMM or AMM supplemented with increasing  
492 concentrations of the echinocandin and second line therapy drug caspofungin  
493 (47). In the presence of 0.5 and 2 µg/ml caspofungin, growth was severely  
494 inhibited and did not differ between both carbon sources (Figure 5D,  
495 Supplementary Figure 3C at 10.6084/m9.figshare.14740482). At 8 µg/ml  
496 caspofungin, the WT strain had increased growth in the presence of glucose  
497 and acetate, due to the caspofungin paradoxical effect (increased fungal growth  
498 in the presence of higher caspofungin concentrations (48)). In the presence of  
499 acetate, the WT was less able to recover growth when compared to growth on  
500 GMM (Figure 5D, Supplementary Figure 3C at 10.6084/m9.figshare.14740482).  
501 These results suggest that oxidative stress and antifungal drug resistance  
502 change depending on the extracellular, available carbon source.

503 **Acetate-grown hyphae are more susceptible to human neutrophil-**  
504 **mediated killing than hyphae grown in the presence of glucose.** The  
505 aforementioned results indicate that growth in the presence of acetate  
506 influences virulence determinants such as SM production, cell wall composition,  
507 oxidative stress and antifungal drug resistance when compared to growth in the  
508 presence of energetically more favourable carbon sources such as glucose. To  
509 determine the role of carbon source-mediated growth for resistance against  
510 human neutrophils, we assayed the viability of hyphae, pre-grown in MM  
511 supplemented with either glucose or acetate as the sole carbon source. To  
512 ensure that a similar number of conidia had germinated prior to incubation with

513 neutrophils, microscopy was performed and the number of germinated conidia  
514 was counted. After incubation for 8 h in GMM and 13 h in AMM, ~ 90% of  
515 conidia had germinated in both conditions (Supplementary Figure 3D at  
516 10.6084/m9.figshare.14740482) and they were visually inspected to be similar  
517 in length (data not shown). Human neutrophils used at different multiplicity of  
518 infection (MOI), killed significantly more (60 - 80%) *A. fumigatus* hyphae grown  
519 in AMM than when compared to hyphae (50 - 60%) pre-grown in GMM (Figure  
520 5E). These results indicate that hyphae grown in acetate-rich medium are more  
521 susceptible to human neutrophil-mediated killing than hyphae grown in the  
522 presence of glucose.

523 **FacB is crucial for virulence in insect and murine models of disseminated**  
524 **and invasive pulmonary aspergillosis (IPA).** Lastly, we assessed the  
525 virulence of the  $\Delta facB$  strain *in vitro* and *in vivo*. First, the capacity of murine  
526 bone marrow-derived macrophages (BMDM) to phagocytose and kill WT,  $\Delta facB$   
527 and  $\Delta facB::facB^+$  conidia was determined. The  $\Delta facB$  strain was significantly  
528 more susceptible to BMDM phagocytosis (Fig. 5F) and a significantly higher  
529 amount of  $\Delta facB$  conidia were killed in comparison to the WT and  $\Delta facB::facB^+$   
530 strains (Fig. 5G).

531 Next, virulence of the WT,  $\Delta facB$  and  $\Delta facB::facB^+$  strains was determined in  
532 the wax moth *Galleria mellonella* and in a neutropenic murine model of IPA. We  
533 used different animal models as virulence *A. fumigatus* was shown to be  
534 dependent on the status of the host immune system(49). In *G. mellonella*  
535 (Figure 6A) and in chemotherapeutic mice (Figure 6B), the  $\Delta facB$  strain was  
536 hypovirulent when compared to the WT and  $\Delta facB::facB^+$  strains. In the insect  
537 model, the WT and  $\Delta facB::facB^+$  strains killed all larvae after 8 days, whereas

538 80% of larvae infected with the  $\Delta facB$  strain survived after 10 days (Figure 6A).  
539 Similarly, the WT and  $\Delta facB::facB^+$  strains killed all mice after 4 days, whereas  
540 10% of mice infected with the  $\Delta facB$  strain survived 6 days post-infection (p.i)  
541 (Figure 6B). In agreement, fungal burden was significantly reduced for the  
542  $\Delta facB$  strain after 3 (Figure 6C) and 7 (Figure 6D) days p.i. in murine lungs  
543 when compared to the WT and  $\Delta facB::facB^+$  strains. In addition, histopathology  
544 analyses of murine lungs after 3 p.i., showed significantly reduced inflammation  
545 (Figure 6E, F) and growth in the lungs (Figure 6F) for the  $\Delta facB$  strain after 3  
546 days p.i. when compared to the WT and  $\Delta facB::facB^+$  strains. Together these  
547 results suggest that FacB is important for *A. fumigatus* virulence in insect and  
548 mammalian hosts.

549 To determine whether the observed reduction in virulence of the *facB* deletion  
550 strain may be due to growth defects, the WT,  $\Delta facB$  and  $\Delta facB::facB^+$  strains  
551 were grown for 72 h in the presence of different media that are similar to the  
552 mammalian host environment before fungal biomass was quantified. The  $\Delta facB$   
553 strain had significantly reduced growth in the presence of low and high-glucose  
554 containing DMEM (Dulbecco's Modified Eagle's Medium), FBS (fetal bovine  
555 serum) and beef extract when compared to the WT and  $\Delta facB::facB^+$  strains but  
556 not in the presence of RPMI 1640 medium and minimal medium supplemented  
557 with glucose (control) (Supplementary Figure 3E at  
558 10.6084/m9.figshare.14740482). These results suggest that the observed  
559 reduction in virulence of the  $\Delta facB$  strain is at least partially due to strain-  
560 specific growth defects in a mammalian host environment.

561

## 562 Discussion

563 This work aimed at deciphering the regulation of the physiologically relevant  
564 carbon source acetate in *A. fumigatus*, and at determining its relevance for  
565 fungal virulence. As a first step, we show that *A. fumigatus* can take up and  
566 metabolise acetate via the TCA and glyoxylate cycles which is in agreement  
567 with studies in *S. cerevisiae* and *A. nidulans* (24, 27). Furthermore, *A. fumigatus*  
568 acetate metabolism was shown to be under the regulatory control of the  
569 transcription factor FacB, which controls the expression of genes encoding  
570 enzymes that are required for the conversion of acetate to acetyl-CoA, for  
571 mitochondrial import of acetyl-CoA and enzymes of the glyoxylate cycle. In  
572 agreement with the transcriptional data, deletion of *facB* also affected ACS  
573 (conversion of acetate to acetyl-CoA) and ICL (glyoxylate cycle) enzyme  
574 activities. These results are in agreement with studies in *A. nidulans*, where  
575 acetate utilisation as sole carbon source is also dependent on FacB, with this  
576 TF regulating the expression of the ACS-encoding gene *facA* and the glyoxylate  
577 cycle enzyme-encoding genes *acuD* (ICL) and *acuF* (malate synthase)(25).

578 In addition, we show that *A. fumigatus* acetate metabolism-related genes as  
579 well as ACS and ICL activities are subject to CCR. This is in contrast to findings  
580 in *C. albicans* where the addition of glucose to lactate-grown cells did not result  
581 in CCR (38). It is important to note here that the experimental conditions  
582 differed between our study and (38) (e.g. *A. fumigatus* growth in acetate and  
583 glucose versus *C. albicans* growth in lactate then addition of glucose). It is well  
584 known that the addition of glucose to cultures causes CCR in *Aspergillus spp*  
585 (36), and the rationale here was therefore to present the fungus with equimolar  
586 concentrations of both carbon sources during all growth stages. Acetate



587 metabolism was also reported to be subject to CCR in *A. nidulans*, with *facB*  
588 and the carnitine acetyltransferase-encoding gene *facC* being under the  
589 regulatory control of the CC-repressor CreA (50, 51).

590 In *A. fumigatus*, CreA-dependent repression of genes encoding enzymes  
591 required for acetate metabolism was observed only for the ICL-encoding gene  
592 *acuD* whereas the other genes were only partially dependent on CreA-mediated  
593 repression. A discrepancy between *acuD* transcript levels and protein activity  
594 was observed. It is possible that basal transcript levels are present in all  
595 conditions to allow to quickly respond to changes in extracellular available  
596 nutrient sources, but that post-transcriptional processing is not taking place.  
597 Indeed, gene transcript levels cannot predict protein levels and activity due to  
598 mRNA spatiotemporal fluctuations and availability of protein synthesis  
599 components (52). Our data suggests that additional repressor proteins and/or  
600 mechanisms exist. In agreement, in *A. nidulans*, CreA has been shown to be  
601 part of a protein complex that mediates target gene repression, and that co-  
602 repressor proteins are crucial for CreA function(53). Furthermore, deletion of *A.*  
603 *fumigatus creA* resulted in significantly decreased expression of acetate  
604 utilisation genes in the presence of acetate, suggesting that CreA may be  
605 involved in the regulation of these genes in the absence of glucose. In *A.*  
606 *nidulans*, CreA was shown to be important for growth in different carbon,  
607 nitrogen and lipid sources and for amino acid metabolism(40); whereas in the  
608 filamentous fungus *Trichoderma reesei*, CRE1 was proposed to have roles in  
609 chromatin remodelling and developmental processes and was shown to also act  
610 as a transcriptional activator (54). These studies suggest that CreA and its

611 homologues have additional roles, other than mitigating CCR, in filamentous  
612 fungi.

613 The deletion of *facB* caused a significantly differential expression of genes that  
614 are part of SM biosynthetic gene clusters (BGC) as well as in secreted SMs. A  
615 direct correlation between transcript and secreted protein levels is not possible  
616 as gene transcript levels cannot predict concentrations of biosynthesised  
617 proteins, due to intrinsic fluctuations in mRNA and availability of protein  
618 synthesis components (52). Furthermore, SM BGC regulation is extremely  
619 complex and governed by many TFs and epigenetic modifications, which result  
620 in the expression of different SM BGC in any given condition (55).  
621 Subsequently, not all of these SMs are secreted and transcriptional expression  
622 of gliotoxin and pyomelanin BGC, as observed here, may be a consequence of  
623 the biosynthesis and secretion of other SMs. The role of FacB in the regulation  
624 of SM biosynthesis is perhaps not surprising as this TF regulates genes  
625 encoding enzymes of central carbon metabolic pathways (e.g. glyoxylate cycle,  
626 shown in this work) during growth on alternative carbon sources. SMs are  
627 known to be derived from these central metabolic pathways(55) and this study  
628 further emphasises that the amount of produced SMs occurs in a carbon  
629 source-dependent manner. Alternatively, the observed low concentrations of  
630 secreted SMs of the  $\Delta facB$  strains may be due to the inability of this strain to  
631 grow in the presence of acetate. Notably, SMs measured in the here defined  
632 conditions may be secreted in response to carbon starvation, especially in the  
633 presence of low (0.1%) glucose and acetate conditions. These results further  
634 emphasise the role of FacB in regulating carbon metabolism. In addition, these  
635 results suggest that the concentration of secreted SMs *in vivo* is likely to also

636 depend on host carbon sources and on carbon source starvation, which is  
637 encountered within different, nutrient-poor host niches.

638 Utilisation of different carbon sources also affects the composition of the *A.*  
639 *fumigatus* cell wall, a factor crucial for fungal virulence and pathogenicity and  
640 survival within the human host(2). This study shows that growth on acetate  
641 results in increased concentrations of the structural polysaccharides  $\beta$ -1,3-  
642 glucan and chitin and reduced levels of the cementing, "glue-like"  $\alpha$ -1,3-glucan  
643 when compared to the *A. fumigatus* cell wall after growth in glucose. Changes  
644 in cell wall composition are likely due to differences in primary carbon  
645 metabolism that govern the utilisation of these carbon sources and that  
646 generate the cell wall polysaccharide precursors(45). Indeed, impairments in *A.*  
647 *fumigatus* glucose utilisation metabolic pathways resulted in an altered cell  
648 wall(45). In agreement with other studies, our work suggests that these changes  
649 in cell wall composition influence *A. fumigatus* susceptibility to physiological-  
650 relevant stresses and antifungal drugs (44, 56). Likely, the significant reduction  
651 in the cementing  $\alpha$ -1,3-glucan disturbs the organisation of the other cell wall  
652 polysaccharides, increasing fungal cell wall permeability and susceptibility to  
653 extracellular stresses. This is true for the  $\beta$ -1,3-glucan synthase inhibitor  
654 caspofungin and for amphotericin B, which physiochemically interacts with  
655 membrane sterols (57). In contrast, increased susceptibility of acetate-grown  
656 hyphae to azoles, a class of antifungal drugs that impair ergosterol biosynthesis  
657 through targeting lanosterol demethylase of the ergosterol biosynthetic  
658 pathway, was not observed. A possible explanation for this may be that  
659 caspofungin and amphotericin B both target cell wall and cell membrane  
660 components, whereas azoles target intracellular enzymes and that despite the

661 differences in cell wall organisation and polysaccharide content, azole uptake is  
662 not affected. In agreement with our data where growth on acetate increases  
663 sensitivity to oxidative stress-inducing compounds, *A. fumigatus* acetate-  
664 germinated hyphae were more susceptible to human neutrophil-mediated killing  
665 *in vitro* when compared to hyphae grown in the presence of glucose. The  
666 observed increase in susceptibility to different immune cells is probably due to  
667 the differences in cell wall composition resulting from growth in both carbon  
668 sources. Our observations are in agreement with a previous study, which  
669 showed that a hypoxic environment influenced cell wall thickness, composition  
670 and surface exposed polysaccharides, subsequently increasing neutrophil and  
671 macrophage reactivity and activity against *A. fumigatus*(58). The  
672 physiological significance of the aforementioned acetate-related differences in  
673 cell wall composition, antifungal drug and oxidative stress resistance and  
674 interaction with neutrophils remains to be determined. Although acetate was  
675 shown to present in the BAL of mice (8), we currently do not know how acetate  
676 concentrations fluctuate within certain parts of the lung and the surrounding  
677 tissues, as has previously been shown for lung hypoxic microenvironments. It  
678 will be interesting to study the distribution of carbon sources in different host  
679 niches in future studies.

680 The  $\Delta facB$  strain exhibited increased susceptibility to macrophage-mediated  
681 phagocytosis and killing. Due to the inability of the  $\Delta facB$  strain to grow in the  
682 presence of acetate, we were unable to quantify cell wall composition in this  
683 strain and therefore determine whether this is a contributing factor when  
684 challenged with BMDMs. The inability of the  $\Delta facB$  strain to use acetate may  
685 account for the observed increase in phagocytosis and killing of this strain,

686 especially as acetate is available as a carbon source in macrophages(59). In  
687 agreement, the expression of genes required for acetate utilisation in the  
688 presence of macrophages has been observed for *A. fumigatus* and prokaryotic  
689 pathogens(14, 60). It is unlikely that the observed increased phagocytosis and  
690 killing of this strain is due to defects in the glyoxylate cycle as previous studies  
691 have revealed that glyoxylate cycle enzymes are dispensable for *A. fumigatus*  
692 virulence(61)(62). This is further supported by our findings that the utilisation of  
693 fatty acids, which results in acetyl-CoA production via  $\beta$ -oxidation(26), is  
694 independent of FacB.

695 Furthermore, the  $\Delta facB$  strain was hypovirulent in both insect and murine  
696 models of invasive aspergillosis. Reduced growth of the *facB* deletion strain in  
697 media simulating the host environment may account for the reduction in  
698 virulence observed for this strain. In addition to acetate metabolism, other FacB-  
699 controlled metabolic pathways, which are required for growth in these highly  
700 complex nutrient sources may be important for pathogenicity. Investigating the  
701 virulence of strains deleted for genes encoding involved in central metabolic  
702 pathways such as the phosphoenolpyruvate (PEP) carboxykinase AcuF, the  
703 ACS FacA and acetyl-CoA mitochondrial and peroxisome import proteins is  
704 subject to future investigations and may further explain the observed reduction  
705 in growth. Additional mechanisms may exist, which are important for virulence  
706 and are regulated by FacB, especially as the FacB regulon is large. Our RNA-  
707 seq data shows that FacB regulates genes encoding proteins important for the  
708 production of SMs and oxidoreduction processes, which contribute to virulence.  
709 In addition, we cannot rule out that FacB has different targets *in vitro* when  
710 compared to *in vivo*, as was previously shown for the *A. fumigatus* AcuM and

711 AcuK transcription factors that are involved in the regulation of gluconeogenesis  
712 and iron acquisition(33). The exact mechanism of FacB for *in vivo* virulence  
713 thus remains to be determined but is possibly a combination of the  
714 aforementioned factors.

715 In summary, this study describes acetate utilisation in *A. fumigatus* and  
716 highlights the importance of carbon source utilisation and metabolic pathways  
717 for determining a variety of fungal traits that are crucial for virulence and that  
718 potentially shape disease outcome. Future studies should focus on this  
719 neglected area of exploring carbon source variety and availability in host  
720 primary sites of infection in order to better understand fungal pathogen nutrient  
721 requirements and utilisation, which can potentially be targeted for developing  
722 anti-fungal strategies.

723

## 724 **Materials and Methods**

725 **Strains and media.** All strains used in this study are listed in Supplementary  
726 Table 1 at [10.6084/m9.figshare.14740482](https://doi.org/10.6084/m9.figshare.14740482). Re-introduction of *facB* through  
727 homologous combination at the *facB* locus was carried out by co-transformation  
728 of the  $\Delta facB$  background strain with the *facB* (amplified by PCR) open reading  
729 frame (ORF, no promoter) and the pyrithiamine-containing plasmid pPTR I at a  
730 ratio of 2:1. Homologous re-integration of *facB* in the the  $\Delta facB$  locus was  
731 confirmed by PCR and by growth assays (Figure 1B). The *facB* deletion mutant  
732 was constructed using hygromycin as a selectable marker (32) and is therefore  
733 resistant to hygromycin and susceptible to pyrithiamine (Figure 1B).  
734 Homologous re-integration of *facB* at the *facB* locus will result in the loss of the

735 hygromycin gene. As pyrithiamine (PT) was used as a marker gene for  
736 construction of the re-integration mutant, the resulting strain is resistant to PT  
737 (Figure 1B). Growth medium composition was exactly as described  
738 previously(40). Radial growth was determined after 5 days whereas dry weight  
739 was measured after 3 days of growth. All growth was performed at 37°C and  
740 experiments were performed in biological triplicates. Reagents were obtained  
741 from Sigma unless otherwise specified.

742 **Nuclear magnetic resonance (NMR) analysis.** Metabolites were extracted  
743 from 5 mg freeze-dried fungal mycelia and dried in a speed vacuum as  
744 described previously(28). Extracts were reconstituted in 50 µL of deuterated  
745 sodium phosphate buffer (100 mM, pH 7.0) containing 0.5 mM TMSP, 3 mM  
746 sodium azide and 100% D<sub>2</sub>O. Each sample was sonicated for 10 minutes and  
747 vortexed briefly, before a volume of 35 µL was transferred into 1.7 mm NMR  
748 tubes.

749 Spectra were acquired on a Bruker 600 MHz spectrometer equipped with a TCI  
750 1.7mm z-PFG cryogenic probe and a Bruker SampleJet autosampler. One-  
751 dimensional (1D) <sup>1</sup>H NMR spectra and 2D <sup>1</sup>H-<sup>13</sup>C HSQC spectra were recorded  
752 and analysed for each sample as previously described(63).

753 **RNA extraction and cDNA biosynthesis.** RNA was extracted with TriZol  
754 (Invitrogen) as described previously(40) and 1 µg of RNA was reverse  
755 transcribed to cDNA using the ImPromII<sup>TM</sup> Reverse Transcriptase kit  
756 (Promega), according to manufacturer's instructions.

757 **RNA-sequencing.** The quality of the RNA was assessed using the Agilent  
758 Bioanalyser 2100 (Agilent technologies) with a minimum RNA Integrity Number

759 (RIN) value of 7.0. Illumina sequencing was used for sample RNA-sequencing  
760 as described previously(64). Libraries were prepared using the  
761 TruSeq®Stranded mRNA LT Set B kit (Illumina) and sequenced (2x100bp) on  
762 the LNBR NGS sequencing facility HiSeq 2500 instrument. RNA-sequencing  
763 data was processed (quality check, clean-up and removal of rRNA and genome  
764 mapping) as described previously(64), with the following modifications. The  
765 Bioconductor package tximport (version 1.12.3) was used to import raw read  
766 counts into DESeq2 (version 1.24.0), which subsequently quantified differential  
767 gene expression. Default Benjamini & Hochberg method was used for multiple  
768 hypothesis correction of DESeq2 differentially expressed genes.

769 **Enzyme activities.** Total cellular proteins were extracted as described  
770 previously(65) and isocitrate lyase (ICL) activity was measured and calculated  
771 as described previously(65). Acetyl-CoA synthetase (ACS) activity was  
772 measured and calculated as described previously(66), with the exception that  
773 intracellular proteins were extracted as described above and ACS activity was  
774 determined in 50 µg total intracellular protein.

775 **High performance liquid chromatography (HPLC) coupled to tandem mass**  
776 **spectrometry (MS/MS) and data analysis.** Fungal biomass was separated  
777 from supernatant by miracloth before 20 ml of culture supernatants were freeze-  
778 dried. Secondary metabolites (SMs) were extracted from 100 mg freeze-dried  
779 sample by re-suspending them in 1 ml HPLC-grade methanol and sonicating  
780 them for 1 h in an ultrasonic bath. Samples were filtered and dried under a  
781 nitrogen stream before being re-suspended in 1 mL of HPLC-grade methanol.  
782 Next, 100 µl of samples were diluted in 900 µl of methanol and passed through  
783 0.22 µm filters into vials.



784 HPLC MS/MS analysis was performed using a Thermo Scientific QExactive<sup>®</sup>  
785 Hybrid Quadrupole-Orbitrap Mass Spectrometer. Parameters were as follows:  
786 positive mode, +3.5 kV capillary voltage; 250 °C capillary temperature; 50 V S-  
787 lens and a *m/z* range of 133.40-2000.00. MS/MS was performed using a  
788 normalized collision energy (NCE) of 30 eV and 5 precursors per cycle were  
789 selected. For the stationary phase the Thermo Scientific Accucore C18 2.6 μm  
790 (2.1 mm x 100 mm) column was used. The mobile phase was carried out using  
791 0.1% formic acid (A) and acetonitrile (B) and the following gradient was applied:  
792 0-10 min 5% B up to 98% B; hold for 5 min; 15-16.2 95% B up to 5% B; hold for  
793 8.8 min. The total run time was 25 min and the flow rate was 0.2 mL min<sup>-1</sup> with 3  
794 μL injection volume. Data analysis was conducted using the Xcalibur software,  
795 version 3.0.63 (Thermo Fisher Scientific).

796 Molecular networks were made using the Global Natural Products Social  
797 Molecular Networking (GNPS) website ([https://ccms-  
798 ucsd.github.io/GNPSDocumentation/](https://ccms-ucsd.github.io/GNPSDocumentation/) from <http://gnps.ucsd.edu>). First, all  
799 MS/MS fragment ions within +/- 17 Da of the precursor *m/z* were removed and  
800 spectra were filtered by choosing only the top 6 fragment ions in the +/- 50 Da  
801 window for the entire spectrum. The precursor ion mass tolerance and the  
802 MS/MS fragment ion tolerance were set to 0.02 Da. Subsequently, networks  
803 were created where edges were filtered to have a cosine score higher than 0.6  
804 and more than 5 matched peaks. Edges between two nodes were kept in the  
805 network only if each of the nodes appeared in each other's respective top 10  
806 most similar nodes. Finally, the maximum size of a molecular family was set to  
807 100, and the lowest scoring edges were removed. Network spectra were then  
808 searched against the GNPS spectral libraries and library spectra were filtered in

809 the same manner as the input data. Matches between network spectra and  
810 library spectra were filtered to have a score higher than 0.6 and at least 5  
811 matching peaks (67). GNPS data used in this work are available at:  
812 [https://gnps.ucsd.edu/ProteoSAFe/status.jsp?task=f815e5618b05433fb768299](https://gnps.ucsd.edu/ProteoSAFe/status.jsp?task=f815e5618b05433fb768299a351fb793)  
813 [a351fb793](https://gnps.ucsd.edu/ProteoSAFe/status.jsp?task=f815e5618b05433fb768299a351fb793) (72 h data).

814 **Cell wall polysaccharide quantification.** Strains were grown for 24 h from  $1 \times$   
815  $10^8$  conidia in 50 ml minimal medium (MM) supplemented with 1% (w/v) glucose  
816 or sodium acetate. Mycelia were harvested by vacuum filtration, washed, re-  
817 suspended in 30 ml of ddH<sub>2</sub>O and disrupted using 5 ml of 0.5 mm glass beads  
818 in the FastPrep (MP Biomedicals) homogenizer at 4°C with two cycles of 60 s  
819 (6.0 vibration unit) and a 5 min interval between both cycles. Samples were  
820 centrifuged at 5000 rpm for 10 min at 4°C, before the cell wall-containing pellets  
821 were washed 3 times with ddH<sub>2</sub>O, re-suspended in 15 ml of 50 mM pH 7.5 Tris-  
822 HCl, 50 mM EDTA, 2% w/v SDS (2%) and 40 mM β-Mercaptoethanol and  
823 boiled twice for 15 min in a water-bath. Samples were centrifuged at 5000 rpm  
824 for 10 min and washed 5 times with ddH<sub>2</sub>O. Resultant cell wall fractions were  
825 freeze-dried and the dry-weight was measured. Alkali-fractionation of the cell  
826 wall was carried out by incubating them twice in 1 M NaOH containing 0.5 M  
827 NaBH<sub>4</sub> at 70°C for 1 h. Samples were centrifuged to separate supernatant  
828 [alkali-soluble (AS) fraction] from the pellet [alkali-insoluble (AI) fraction]. The AI  
829 fractions was washed six times with ddH<sub>2</sub>O and centrifuged at 5000 rpm for 10  
830 min and freeze-dried. The excess of NaBH<sub>4</sub> in the alkali-soluble fraction (AS)  
831 was neutralized with 2% v/v acetic acid, dialyzed against water until they  
832 achieved a neutral pH and freeze-dried. Subsequently, AI and AS fractions  
833 were subjected to gas liquid chromatography as previously described(68).

834 **Minimal inhibitory concentrations (MICs).** MICs of amphotericin B and azoles  
835 on the *A. fumigatus* wild-type (WT) strain were carried out as described  
836 previously(69) with the exception that the WT strain was also grown in MM  
837 supplemented with glucose (GMM) or acetate (AMM).

838 **Neutrophil-mediated killing of hyphae.** Assessing the viability of *A. fumigatus*  
839 hyphae in the presence of human neutrophils was carried out as described  
840 previously with modifications(70). Briefly, human polymorphonuclear cells  
841 (PMNs) were isolated from 8 mL of peripheral blood of adult male healthy  
842 volunteers by density centrifugation and re-suspended in Hank's Balanced Salt  
843 Solution (Gibco®).  $1 \times 10^8$  *A. fumigatus* conidia were incubated for 8 h or 13 h  
844 at 37°C in 30 ml GMM or AMM on a rotary shaker before they were centrifuged  
845 for 5 min at 4000 rpm, supernatants were discarded and pellets were re-  
846 suspended in 1 ml PBS (phosphate buffered saline). To assess the percentage  
847 of germinated conidia, samples were viewed under a microscope (Zeiss) at  
848 100x magnification before a total of 100 conidia were counted and the % of  
849 germinated conidia was calculated. Pre-grown hyphae were then incubated with  
850 neutrophils (0, 1, 2 or  $3 \times 10^5$  cells / ml) for 1 h at 37°C in RPMI medium before  
851 cells were lysed and the MTT [3-(4,5-dimethylthiazol-2-yl)-2,5-  
852 diphenyltetrazolium bromide] assay was performed. Hyphal viability was  
853 calculated as a percentage of its viability after incubation without neutrophils.

854 **Bone marrow-derived macrophage (BMDM) phagocytosis and killing**  
855 **assays.** BMDM preparation and the ability to kill *A. fumigatus* conidia, as  
856 determined by assessing colony forming units (CFU), was carried out exactly as  
857 described previously(71). The ability of BMDMs to phagocytise *A. fumigatus*  
858 conidia was carried out exactly as described in(72). Fresh *A. fumigatus* conidia

859 were harvested from plates in PBS and filtered through Miracloth (Calbiochem).  
860 Conidial suspensions were washed three times with PBS and counted using a  
861 hemocytometer. For the killing assay, a dilution of  $1 \times 10^5$  conidia in 200  $\mu$ l RPMI-  
862 FCS was prepared. For the phagocytosis assay,  $1 \times 10^6$  conidia were re-  
863 suspended in 1 ml PBS and inactivated under UV light for 2 h. The percentage  
864 of phagocytised conidia was calculated based on conidia cell wall staining with  
865 calcofluor white (CFW) (phagocytised conidia are not stained).

866 **Infection of *Galleria mellonella*.** Breeding and selection of wax moth larvae,  
867 preparation of *A. fumigatus* conidia and infection of the last left proleg of larvae  
868 with *A. fumigatus* was carried out exactly as described previously(73).

869 **Ethics statement.** Eight-week-old gender- and age-matched C57BL/6 mice  
870 were bred under the specific-pathogen-free condition and kept at the Life and  
871 Health Sciences Research Institute (ICVS) Animal Facility. Animal  
872 experimentation was performed following biosafety level 2 (BSL-2) protocols  
873 approved by the Institutional Animal Care and Use Committee (IACUC) of  
874 University of Minho, and the ethical and regulatory approvals were consented  
875 by the Ethics Subcommittee for Life and Health Sciences (no. 074/016). All  
876 procedures followed the EU-adopted regulations (Directive 2010/63/EU) and  
877 were conducted according to the guidelines sanctioned by the Portuguese  
878 ethics committee for animal experimentation, Direção-Geral de Alimentação e  
879 Veterinária (DGAV).

880 **Infection of chemotherapeutic mice, fungal burden and histopathology.**  
881 Mice were immunosuppressed intraperitoneally (i.p.) with 200 mg/Kg of  
882 cyclophosphamide (Sigma) on days -4, -1, and +2 prior to and post infection,

883 and subcutaneously with 150 mg/Kg hydrocortisone acetate (Acros Organics)  
884 on day -1 prior to infection. *A. fumigatus* conidia suspensions were prepared  
885 freshly a day prior to infection and washed three times with PBS. The viability of  
886 the administered conidia was determined by growing them in serial dilutions on  
887 complete (YAG) medium at 37°C. Mice (n = 10/strain) were infected by  
888 intranasal instillation of  $1 \times 10^6$  conidia in 20  $\mu$ l of PBS. Mice (n = 5) which  
889 received 20  $\mu$ l of PBS were used as negative control. To avoid bacterial  
890 infections, the animals were treated with 50  $\mu$ g/mL of chloramphenicol in  
891 drinking water ad libitum. Animals were weighed daily and sacrificed in case of  
892 20% loss weight, severe ataxia or hypothermia, and other severe complications.

893 For histological analysis, the lungs were perfused with PBS, excised, and fixed  
894 with 10% buffered formalin solution for at least 48 hours, and paraffin  
895 embedded. Lung sections were stained with hematoxylin and eosin (H&E) for  
896 pathological examination. Paraffin-embedded lung tissue sections were also  
897 stained for the presence of fungal structures using the Silver Stain Kit (Sigma-  
898 Aldrich), according to the manufacturer's instructions. Images were acquired  
899 using a BX61 microscope (Olympus) and a DP70 high-resolution camera  
900 (Olympus). To quantify lung inflammation of infected animals, inflamed areas on  
901 slide images were analysed using the thresholding tool in ImageJ software  
902 (v1.50i, NIH, USA) according to the manufacturer's instructions.

903 **Data Availability.** The RNAseq dataset can be accessed at NCBI's Short Read  
904 Archive under the Bioproject ID: PRJNA668271.

905

906

907 **References**

- 908 1. **Denning DW, Bromley MJ.** 2015. How to bolster the antifungal pipeline.  
909 Science (80-. ). **347**:1414–1416.
- 910 2. **Latgé J-P, Chamilos G.** 2020. *Aspergillus fumigatus* and Aspergillosis in  
911 2019. Clin. Microbiol. Rev. **33**:1–75.
- 912 3. **Ramachandra S, Linde J, Brock M, Guthke R, Hube B, Brunke S.**  
913 2014. Regulatory networks controlling nitrogen sensing and uptake in  
914 *Candida albicans*. PLoS One **9**.
- 915 4. **Matthaiou EI, Sass G, Stevens DA, Hsu JL.** 2018. Iron: an essential  
916 nutrient for *Aspergillus fumigatus* and a fulcrum for pathogenesis. Curr.  
917 Opin. Infect. Dis. **31**:506–511.
- 918 5. **Vicentefranqueira R, Leal F, Marín L, Sánchez CI, Calera JA.** 2019.  
919 The interplay between zinc and iron homeostasis in *Aspergillus fumigatus*  
920 under zinc-replete conditions relies on the iron-mediated regulation of  
921 alternative transcription units of *zafA* and the basal amount of the *ZafA*  
922 zinc-responsiveness transcription fac. Environ. Microbiol. **21**:2787–2808.
- 923 6. **Raffa N, Osherov N, Keller NP.** 2019. Copper utilization, regulation, and  
924 acquisition by *aspergillus fumigatus*. Int. J. Mol. Sci. **20**.
- 925 7. **Ries LNA, Beattie S, Cramer RA, Goldman GH.** 2018. Overview of  
926 carbon and nitrogen catabolite metabolism in the virulence of human  
927 pathogenic fungi. Mol. Microbiol. **107**.
- 928 8. **Grahl N, Puttikamonkul S, Macdonald JM, Gamcsik MP, Ngo LY,**  
929 **Hohl TM, Cramer RA.** 2011. In vivo hypoxia and a fungal alcohol

- 930 dehydrogenase influence the pathogenesis of invasive pulmonary  
931 aspergillosis. *PLoS Pathog.* **7**.
- 932 9. **Beattie SR, Mark KMK, Thammahong A, Ries LNA, Dhingra S,**  
933 **Caffrey-Carr AK, Cheng C, Black CC, Bowyer P, Bromley MJ, Obar**  
934 **JJ, Goldman GH, Cramer RA.** 2017. Filamentous fungal carbon  
935 catabolite repression supports metabolic plasticity and stress responses  
936 essential for disease progression. *PLoS Pathog.* **13**.
- 937 10. **Schug ZT, Vande Voorde J, Gottlieb E.** 2016. The metabolic fate of  
938 acetate in cancer. *Nat. Rev. Cancer* **16**:708–717.
- 939 11. **Li M, van Esch BCAM, Wagenaar GTM, Garssen J, Folkerts G,**  
940 **Henricks PAJ.** 2018. Pro- and anti-inflammatory effects of short chain  
941 fatty acids on immune and endothelial cells. *Eur. J. Pharmacol.* **831**:52–  
942 59.
- 943 12. **Dickson RP, Erb-Downward JR, Martinez FJ, Huffnagle GB.** 2016.  
944 The Microbiome and the Respiratory Tract. *Annu Rev Physiol* **10**:481–  
945 504.
- 946 13. **Anand S, Mande SS.** 2018. Diet, microbiota and gut-lung connection.  
947 *Front. Microbiol.* **9**.
- 948 14. **Sugui JA, Kim HS, Zarembek KA, Chang YC, Gallin JI, Nierman WC,**  
949 **Kwon-Chung KJ.** 2008. Genes differentially expressed in conidia and  
950 hyphae of *Aspergillus fumigatus* upon exposure to human neutrophils.  
951 *PLoS One* **3**.
- 952 15. **Barelle CJ, Priest CL, MacCallum DM, Gow NAR, Odds FC, Brown**

- 953           **AJP**. 2006. Niche-specific regulation of central metabolic pathways in a  
954           fungal pathogen. *Cell. Microbiol.* **8**:961–971.
- 955   16.   **Chen Y, Toffaletti DL, Tenor JL, Litvintseva AP, Fang C, Mitchell TG,**  
956           **McDonald TR, Nielsen K, Boulware DR, Bicanic T, Perfect JR**. 2014.  
957           The *Cryptococcus neoformans* Transcriptome at the Site of Human  
958           Meningitis. *MBio* **5**:277–297.
- 959   17.   **McDonagh A, Fedorova ND, Crabtree J, Yu Y, Kim S, Chen D, Loss**  
960           **O, Cairns T, Goldman G, Armstrong-James D, Haynes K, Haas H,**  
961           **Schrettl M, May G, Nierman WC, Bignell E**. 2008. Sub-telomere  
962           directed gene expression during initiation of invasive aspergillosis. *PLoS*  
963           *Pathog.* **4**.
- 964   18.   **Bertuzzi M, Schrettl M, Alcazar-Fuoli L, Cairns TC, Muñoz A, Walker**  
965           **LA, Herbst S, Safari M, Cheverton AM, Chen D, Liu H, Saijo S,**  
966           **Fedorova ND, Armstrong-James D, Munro CA, Read ND, Filler SG,**  
967           **Espeso EA, Nierman WC, Haas H, Bignell EM**. 2014. The pH-  
968           Responsive PacC Transcription Factor of *Aspergillus fumigatus* Governs  
969           Epithelial Entry and Tissue Invasion during Pulmonary Aspergillosis.  
970           *PLoS Pathog.* **10**.
- 971   19.   **Kale SD, Ayubi T, Chung D, Tubau-Juni N, Leber A, Dang HX,**  
972           **Karyala S, Hontecillas R, Lawrence CB, Cramer RA, Bassaganya-**  
973           **Riera J**. 2017. Modulation of Immune Signaling and Metabolism  
974           Highlights Host and Fungal Transcriptional Responses in Mouse Models  
975           of Invasive Pulmonary Aspergillosis. *Sci. Rep.* **7**:1–25.
- 976   20.   **Liu H, Xu W, Bruno VM, Phan QT, Solis N V., Woolford CA, Ehrlich**



- 977 **RL, Shetty AC, McCracken C, Lin J, Bromley MJ, Mitchell AP, Filler**  
978 **SG.** 2021. Determining *Aspergillus fumigatus* transcription factor  
979 expression and function during invasion of the mammalian lung. *PLoS*  
980 *Pathog.* **17.**
- 981 21. **Albrecht D, Guthke R, Brakhage AA, Kniemeyer O.** 2010. Integrative  
982 analysis of the heat shock response in *Aspergillus fumigatus*. *BMC*  
983 *Genomics* **11.**
- 984 22. **Vödisch M, Scherlach K, Winkler R, Hertweck C, Braun HP, Roth M,**  
985 **Haas H, Werner ER, Brakhage AA, Kniemeyer O.** 2011. Analysis of the  
986 *Aspergillus fumigatus* proteome reveals metabolic changes and the  
987 activation of the pseurotin A biosynthesis gene cluster in response to  
988 hypoxia. *J. Proteome Res.* **10:2508–2524.**
- 989 23. **Sá-Pessoa J, Amillis S, Casal M, Diallinas G.** 2015. Expression and  
990 specificity profile of the major acetate transporter AcpA in *Aspergillus*  
991 *nidulans*. *Fungal Genet. Biol.* **76:93–103.**
- 992 24. **Hynes MJ, Murray SL, Andrianopoulos A, Davis MA.** 2011. Role of  
993 carnitine acetyltransferases in acetyl coenzyme a metabolism in  
994 *Aspergillus nidulans*. *Eukaryot. Cell* **10:547–555.**
- 995 25. **Todd RB, Andrianopoulos A, Davis MA, Hynes MJ.** 1998. FacB, the  
996 *Aspergillus nidulans* activator of acetate utilization genes, binds dissimilar  
997 DNA sequences. *EMBO J.* **17:2042–2054.**
- 998 26. **Hynes MJ, Murray SL, Duncan A, Khew GS, Davis MA.** 2006.  
999 Regulatory genes controlling fatty acid catabolism and peroxisomal  
1000 functions in the filamentous fungus *Aspergillus nidulans*. *Eukaryot. Cell*

- 1001           **5:794–805.**
- 1002   27.   **McCammion MT.** 1996. Mutants of *Saccharomyces cerevisiae* with  
1003           defects in acetate metabolism: Isolation and characterization of Acn-  
1004           mutants. *Genetics* **144**:57–69.
- 1005   28.   **Ries LNA, de Assis LJ, Rodrigues FJS, Caldana C, Rocha MC,**  
1006           **Malavazi I, Bayram Ö, Goldman GH.** 2018. The *Aspergillus nidulans*  
1007           pyruvate dehydrogenase kinases are essential to integrate carbon source  
1008           metabolism. *G3 Genes, Genomes, Genet.* **8.**
- 1009   29.   **Rodrigues ML, Rozental S, Couceiro JNSS, Angluster J, Alviano CS,**  
1010           **Travassos LR.** 1997. Identification of N-Acetylneuraminic acid and its 9-  
1011           O-acetylated derivative on the cell surface of *Cryptococcus neoformans*.  
1012           Influence on fungal phagocytosis. *Infect. Immun.* **65**:4937–4942.
- 1013   30.   **Soares R, de A Soares R, Alviano D, Angluster J, Alviano C,**  
1014           **Travassos L.** 2000. Identification of sialic acids on the cell surface of  
1015           *Candida albicans*. *Biochim Biophys Acta* **1474**:262–268.
- 1016   31.   **Warwas ML, Watson JN, Bennet AJ, Moore MM.** 2007. Structure and  
1017           role of sialic acids on the surface of *Aspergillus fumigatus* conidiospores.  
1018           *Glycobiology* **17**:401–410.
- 1019   32.   **Furukawa T, van Rhijn N, Fraczek M, Gsaller F, Davies E, Carr P,**  
1020           **Gago S, Fortune-Grant R, Rahman S, Gilsenan JM, Houlder E,**  
1021           **Kowalski CH, Raj S, Paul S, Cook P, Parker JE, Kelly S, Cramer RA,**  
1022           **Latgé JP, Moye-Rowley S, Bignell E, Bowyer P, Bromley MJ.** 2020.  
1023           The negative cofactor 2 complex is a key regulator of drug resistance in  
1024           *Aspergillus fumigatus*. *Nat. Commun.* **11.**

- 1025 33. **Pongpom M, Liu H, Xu W, Snarr BD, Sheppard DC, Mitchell AP, Filler**  
1026 **SG.** 2015. Divergent targets of *Aspergillus fumigatus* AcuK and AcuM  
1027 transcription factors during growth in vitro versus invasive disease. *Infect.*  
1028 *Immun.* **83**:923–933.
- 1029 34. **Smith TD, Calvo AM.** 2014. The mtfA transcription factor gene controls  
1030 morphogenesis, gliotoxin production, and virulence in the opportunistic  
1031 human pathogen *Aspergillus fumigatus*. *Eukaryot. Cell* **13**:766–775.
- 1032 35. **de Assis LJ, Ries LNA, Savoldi M, Dinamarco TM, Goldman GH,**  
1033 **Brown NA.** 2015. Multiple phosphatases regulate carbon source-  
1034 dependent germination and primary metabolism in *aspergillus nidulans*.  
1035 *G3 Genes, Genomes, Genet.* **5**.
- 1036 36. **Adnan M, Zheng W, Islam W, Arif M, Abubakar YS, Wang Z, Lu G.**  
1037 2018. Carbon catabolite repression in filamentous Fungi. *Int. J. Mol. Sci.*  
1038 **19**:1–23.
- 1039 37. **Candida Y, Sandai D, Zhikang Y, Selway L.** 2012. Carbon Assimilation  
1040 in the Pathogenic The Evolutionary Rewiring of Ubiquitination Targets  
1041 *Has* **3**:1–13.
- 1042 38. **Childers DS, Raziunaite I, Mol Avelar G, Mackie J, Budge S, Stead D,**  
1043 **Gow NAR, Lenardon MD, Ballou ER, MacCallum DM, Brown AJP.**  
1044 2016. The Rewiring of Ubiquitination Targets in a Pathogenic Yeast  
1045 Promotes Metabolic Flexibility, Host Colonization and Virulence. *PLoS*  
1046 *Pathog.* **12**:1–26.
- 1047 39. **Reis TF Dos, Menino JF, Bom VLP, Brown NA, Colabardini AC,**  
1048 **Savoldi M, Goldman MHS, Rodrigues F, Goldman GH.** 2013.

- 1049 Identification of glucose transporters in aspergillus nidulans. PLoS One **8**.
- 1050 40. **Ries LNA, Beattie SR, Espeso EA, Cramer RA, Goldman GH.** 2016.
- 1051 Diverse regulation of the CreA carbon catabolite repressor in aspergillus
- 1052 nidulans. Genetics **203**.
- 1053 41. **Raffa N, Keller NP.** 2019. A call to arms: Mustering secondary
- 1054 metabolites for success and survival of an opportunistic pathogen. PLoS
- 1055 Pathog. **15**:1–9.
- 1056 42. **Bignell E, Cairns TC, Throckmorton K, Nierman WC, Keller NP.** 2016.
- 1057 Secondary metabolite arsenal of an opportunistic pathogenic fungus.
- 1058 Philos. Trans. R. Soc. B Biol. Sci. **371**:1–9.
- 1059 43. **Tabata N, Tanaka H, Omura S.** 1996. Pyripyropenes , Novel
- 1060 ACATInhibitors Produced by Aspergillus fumigatus IV . Structure
- 1061 Elucidation of Pyripyropenes Mto R Wehave reported pyripyropenes A to
- 1062 L , a novel series of polyoxygenated metabolites produced by Aspergillus
- 1063 292–298.
- 1064 44. **Clavaud C, Beauvais A, Barbin L, Munier-Lehmann H, Latgé JP.**
- 1065 2012. The composition of the culture medium influences the  $\beta$ -1,3-
- 1066 glucanmetabolism of Aspergillus fumigatus and the antifungal activity of
- 1067 inhibitors of  $\beta$ -1,3-glucan synthesis. Antimicrob. Agents Chemother.
- 1068 **56**:3428–3431.
- 1069 45. **de Assis LJ, Manfiolli A, Mattos E, Jacobsen ID, Brock M, Cramer**
- 1070 **RA, Thammahong A, Hagiwara D, Nicolas L, Ries A, Goldman GH.**
- 1071 2018. Protein Kinase A and High-Osmolarity Glycerol Response
- 1072 Pathways Cooperatively Control Cell Wall Carbohydrate Mobilization in

- 1073            *Aspergillus fumigatus*. *MBio* **9**.
- 1074    46.    **Latgé J-P, Beauvais A, Chamilos G.** 2017. The Cell Wall of the Human  
1075            Fungal Pathogen *Aspergillus fumigatus*: Biosynthesis, Organization,  
1076            Immune Response, and Virulence . *Annu. Rev. Microbiol.* **71**:99–116.
- 1077    47.    **Hiemenz JW, Raad II, Maertens JA, Hachem RY, Saah AJ, Sable CA,**  
1078            **Chodakewitz JA, Severino ME, Saddier P, Berman RS, Ryan DM,**  
1079            **Dinubile MJ, Patterson TF, Denning DW, Walsh TJ.** 2010. Efficacy of  
1080            caspofungin as salvage therapy for invasive aspergillosis compared to  
1081            standard therapy in a historical cohort. *Eur. J. Clin. Microbiol. Infect. Dis.*  
1082            **29**:1387–1394.
- 1083    48.    **Loiko V, Wagener J.** 2017. The paradoxical effect of echinocandins in  
1084            *Aspergillus fumigatus* relies on recovery of the  $\beta$ -1,3-glucan synthase  
1085            Fks1. *Antimicrob. Agents Chemother.* **61**:1–11.
- 1086    49.    **Ries LNA, Steenwyk JL, De Castro PA, De Lima PBA, Almeida F, De**  
1087            **Assis LJ, Manfiolli AO, Takahashi-Nakaguchi A, Kusuya Y, Hagiwara**  
1088            **D, Takahashi H, Wang X, Obar JJ, Rokas A, Goldman GH.** 2019.  
1089            Nutritional heterogeneity among *aspergillus fumigatus* strains has  
1090            consequences for virulence in a strain- And host-dependent manner.  
1091            *Front. Microbiol.* **10**:1–20.
- 1092    50.    **Katz ME, Hynes MJ.** 1989. Isolation and analysis of the acetate  
1093            regulatory gene, *facB*, from *Aspergillus nidulans*. *Mol. Cell. Biol.* **9**:5696–  
1094            5701.
- 1095    51.    **Stemple CJ, Davis MA, Hynes MJ.** 1998. The *facC* gene of *Aspergillus*  
1096            *nidulans* encodes an acetate-inducible carnitine acetyltransferase. *J.*

- 1097 Bacteriol. **180**:6242–6251.
- 1098 52. **Liu Y, Beyer A, Aebersold R.** 2016. On the Dependency of Cellular  
1099 Protein Levels on mRNA Abundance. *Cell* **165**:535–550.
- 1100 53. **de Assis LJ, Ulas M, Ries LNA, El Ramli NAM, Sarikaya-Bayram O,**  
1101 **Braus GH, Bayram O, Goldman GH.** 2018. Regulation of *Aspergillus*  
1102 *nidulans* CreA-mediated catabolite repression by the F-Box proteins  
1103 Fbx23 and Fbx47. *MBio* **9**.
- 1104 54. **Portnoy T, Margeot A, Linke R, Atanasova L, Fekete E, Sándor E,**  
1105 **Hartl L, Karaffa L, Druzhinina IS, Seiboth B, Le Crom S, Kubicek CP.**  
1106 2011. The CRE1 carbon catabolite repressor of the fungus *Trichoderma*  
1107 *reesei*: A master regulator of carbon assimilation. *BMC Genomics* **12**:269.
- 1108 55. **Keller NP.** 2019. Fungal secondary metabolism: regulation, function and  
1109 drug discovery. *Nat. Rev. Microbiol.* **17**:167–180.
- 1110 56. **Tortorano AM, Dannaoui E, Meletiadis J, Mallie M, Viviani MA, Piens**  
1111 **MA, Rigoni AL, Bastide JM, Grillot R, Lebeau B, Burnod J, Nolard N,**  
1112 **Symoens F, Goens K, Heinermann S, Bertout S, Castel D, Renaud F,**  
1113 **De Mëeus T, Perraud M, Monier MF, Chapuis F, Cogliati M, Barton R,**  
1114 **Evans EGV, Ashbee HR, Hopwood V, Meis JF, Voss A, Verweij PE,**  
1115 **Donnelly JP, Rath PM, Ansorg R.** 2002. Effect of medium composition  
1116 on static and cidal activity of amphotericin B, itraconazole, voriconazole,  
1117 posaconazole and terbinafine against *Aspergillus fumigatus*: A multicenter  
1118 study. *J. Chemother.* **14**:246–252.
- 1119 57. **GHANNOUM MAHMOUD A., RICE LOUIS B.** 1999. Antifungal Agents:  
1120 Mode of Action, Mechanisms of Resistance, and Correlation of These

- 1121 Mechanisms with Bacterial Resistance. *Clin. Microbiol. Rev.* **12**:501–517.
- 1122 58. **Shepardsona KM, Ngoc LY, Amaniandad V, Latge J-P, Barkera BM,**  
1123 **Blossera SJ, Iwakurae Y, Hohl TM, Cramer RA.** 2013. Hypoxia  
1124 enhances innate immune activation to *Aspergillus fumigatus* through cell  
1125 wall modulation. *Microbes Infect.* **15**:259–269.
- 1126 59. **Viola A, Munari F, Sánchez-Rodríguez R, Scolaro T, Castegna A.**  
1127 2019. The metabolic signature of macrophage responses. *Front.*  
1128 *Immunol.* **10**:1–16.
- 1129 60. **Zhughe X, Sun Y, Jiang M, Wang J, Tang F, Xue F, Ren J, Zhu W, Dai**  
1130 **J.** 2019. Acetate metabolic requirement of avian pathogenic *Escherichia*  
1131 *coli* promotes its intracellular proliferation within macrophage. *Vet. Res.*  
1132 **50**:31.
- 1133 61. **Schöbel F, Ibrahim-Granet O, Avé P, Latgé JP, Brakhage AA, Brock**  
1134 **M.** 2007. *Aspergillus fumigatus* does not require fatty acid metabolism via  
1135 isocitrate lyase for development of invasive aspergillosis. *Infect. Immun.*  
1136 **75**:1237–1244.
- 1137 62. **Olivas I, Royuela M, Romero B, Monteiro MC, Mínguez JM, Laborda**  
1138 **F, Lucas JR De.** 2008. Ability to grow on lipids accounts for the fully  
1139 virulent phenotype in neutropenic mice of *Aspergillus fumigatus* null  
1140 mutants in the key glyoxylate cycle enzymes. *Fungal Genet. Biol.* **45**:45–  
1141 60.
- 1142 63. **Saborano R, Eraslan Z, Roberts J, Khanim FL, Lalor PF, Reed MAC,**  
1143 **Günther UL.** 2019. A framework for tracer-based metabolism in  
1144 mammalian cells by NMR. *Sci. Rep.* **9**:1–13.

- 1145 64. **Pereira Silva L, Alves de Castro P, dos Reis TF, Paziani MH, Von**  
1146 **Zeska Kress MR, Riaño-Pachón DM, Hagiwara D, Ries LNA, Brown**  
1147 **NA, Goldman GH.** 2017. Genome-wide transcriptome analysis of  
1148 *Aspergillus fumigatus* exposed to osmotic stress reveals regulators of  
1149 osmotic and cell wall stresses that are SakA<sup>HOG1</sup> and MpkC dependent.  
1150 *Cell. Microbiol.* **19**.
- 1151 65. **Ries LNA, José de Assis L, Rodrigues FJS, Caldana C, Rocha MC,**  
1152 **Malavazi I, Bayram Ö, Goldman GH.** 2018. The *Aspergillus nidulans*  
1153 Pyruvate Dehydrogenase Kinases Are Essential To Integrate Carbon  
1154 Source Metabolism . *G3&#58; Genes|Genomes|Genetics* **8**:2445–  
1155 2463.
- 1156 66. **Castano-Cerezo S, Bernal V, Canovas M.** 2012. [http://www.bio-](http://www.bio-protocol.org/e256)  
1157 [protocol.org/e256](http://www.bio-protocol.org/e256) Vol 2, Iss 17, Sep 05, 2012. *Bio-protocol* **2**:e256.
- 1158 67. **Wang M, Carver JJ, Phelan V V., Sanchez LM., Garg N., Peng Y.,**  
1159 **Nguyen DD., Watrous J., Kaponi CA., Luzzatto-Knaan T., Porto C.,**  
1160 **Bouslimani A., Melnik AV., Meehan MJ., Liu W-T., Crüsemann M.,**  
1161 **Boudreau PD., Esquenazi E., Sandoval-Calderon M., Kersten RD.,**  
1162 **Pace LA., Quinn RA., Duncan KR., Hsu C-C., Floros DJ., Gavilan RG.,**  
1163 **Kleigrewe K., Northen T., Dutton RJ., Parrot D., Carlson EE., Aigle B.,**  
1164 **Michelsen CF., Jelsbak L., Sohlenkamp C., Pevzner P., Edlund A.,**  
1165 **McLean J., Piel J., Murphy BT., Gerwick L., Liaw C-C., Yang Y-L.,**  
1166 **Humpf H-U., Maansson M., Keyzers RA., Sims AC., Johnson AR.,**  
1167 **Sidebottom AM., Sedio BE., Klitgaard A., Larson CB., Boya P CA.,**  
1168 **TorresMendoza D., Gonzalez DJ., Silva DB., Marques LM., Demarque**



- 1169 **DP., Pociute E., O'Neill EC., Briand E., Helfrich E.J.N., Granatosky EA.,**  
1170 **Glukhov E., Ryffel F., Houson H., Mohimani H., Kharbush J.J., Zeng**  
1171 **Y., Vorholt J.A., Kurita K.L., Charusanti P., McPhail K.L., Nielsen K.F.,**  
1172 **Vuong L., Elfeki M., Traxler M.F., Engene N., Koyama N., Vining O.B.,**  
1173 **Baric R., Silva R.R., Mascuch S.J., Tomasi S., Jenkins S., Macherla V.,**  
1174 **Hoffman T., Agarwal V., Williams P.G., Dai J., Neupane R., Gurr J.,**  
1175 **Rodríguez A.M.C., Lamsa A., Zhang C., Dorrestein K., Duggan B.M.,**  
1176 **Almaliti J., Allard P.-M., Phapale P., Nothias L.-F., Alexandrov T.,**  
1177 **Litaudon M., Wolfender J.-L., Kyle J.E., Metz T.O., Peryea T., Nguyen**  
1178 **D.-T., VanLeer D., Shinn P., Jadhav A., Müller R., Waters K.M., Shi W.,**  
1179 **Liu X., Zhang L., Knight R., Jensen P.R., Palsson B.Ø., Pogliano K.,**  
1180 **Linnington R.G., Gutierrez M., Lopes N.P., Gerwick W.H., Moore B.S.,**  
1181 **Dorrestein P.C., Bandeira N.** 2017. Sharing and community curation of  
1182 mass spectrometry data with GNPS. *Nat. Biotechnol.* **34**:828–837.
- 1183 68. **Richie D.L., Hartl L., Amanianda V., Winters M.S., Fuller K.K., Miley M.D.,**  
1184 **White S., McCarthy J.W., Latgé J.P., Feldmesser M., Rhodes J.C., Askew**  
1185 **D.S.** 2009. A role for the unfolded protein response (UPR) in virulence and  
1186 antifungal susceptibility in *Aspergillus fumigatus*. *PLoS Pathog.* **5**.
- 1187 69. **Bastos R.W., Valero C., Silva L.P., Schoen T., Drott M., Brauer V., Silva-**  
1188 **Rocha R., Lind A., Steenwyk J.L., Rokas A., Rodrigues F., Resendiz-**  
1189 **Sharpe A., Lagrou K., Marcet-Houben M., Gabaldón T., McDonnell E.,**  
1190 **Reid I., Tsang A., Oakley B.R., Loures F.V., Almeida F., Huttenlocher A.,**  
1191 **Keller N.P., Ries L.N.A., Goldman G.H.** 2020. Functional characterization  
1192 of clinical isolates of the opportunistic fungal pathogen *Aspergillus*  
1193 *nidulans*. *bioRxiv* 2020.01.28.917278.

- 1194 70. **Steenwyk JL, Lind AL, Ries LNA, dos Reis TF, Silva LP, Almeida F,**  
1195 **Bastos RW, Fraga da Silva TF de C, Bonato VLD, Pessoni AM,**  
1196 **Rodrigues F, Raja HA, Knowles SL, Oberlies NH, Lagrou K, Goldman**  
1197 **GH, Rokas A.** 2020. Pathogenic Allodiploid Hybrids of *Aspergillus* Fungi.  
1198 *Curr. Biol.* **30**:2495–2507.e7.
- 1199 71. **de Castro PA, Colabardini AC, Manfiolli AO, Chiaratto J, Silva LP,**  
1200 **Mattos EC, Palmisano G, Almeida F, Persinoti GF, Ries LNA, Mellado**  
1201 **L, Rocha MC, Bromley M, Silva RN, de Souza GS, Loures FV,**  
1202 **Malavazi I, Brown NA, Goldman GH.** 2019. *Aspergillus fumigatus*  
1203 calcium-responsive transcription factors regulate cell wall architecture  
1204 promoting stress tolerance, virulence and caspofungin resistance *PLoS*  
1205 *Genetics*.
- 1206 72. **Rocha MC, de Godoy KF, Bannitz-Fernandes R, Fabri JHTM,**  
1207 **Barbosa MMF, de Castro PA, Almeida F, Goldman GH, da Cunha AF,**  
1208 **Netto LES, de Oliveira MA, Malavazi I.** 2018. Analyses of the three 1-  
1209 Cys Peroxiredoxins from *Aspergillus fumigatus* reveal that cytosolic Prx1  
1210 is central to H<sub>2</sub>O<sub>2</sub> metabolism and virulence. *Sci. Rep.* **8**:1–18.
- 1211 73. **dos Reis TF, Silva LP, de Castro PA, de Lima PBA, do Carmo RA,**  
1212 **Marini MM, da Silveira JF, Ferreira BH, Rodrigues F, Malavazi I,**  
1213 **Goldman GH.** 2018. The influence of genetic stability on *Aspergillus*  
1214 *fumigatus* virulence and azole resistance. *G3 Genes, Genomes, Genet.*  
1215 **8**:265–278.
- 1216
- 1217

## 1218 **Acknowledgements**

1219 We are grateful to the Henry Welcome Building for Biomolecular NMR staff at  
1220 the University of Birmingham for supporting access to NMR instruments. We  
1221 would also like to thank the Brazilian Biorenewables National Laboratory  
1222 (LNBR) for using the NGS sequencing facility to generate the RNA-seq data.

1223 We would like to thank the São Paulo Research Foundation (FAPESP-  
1224 Fundacao de Amparo a Pesquisa do Estado de Sao Paulo, Brazil) grant  
1225 numbers 2017/14159-2 (LNAR), 2016/12948-7 (PAC), 2017/08750-0 (TFR),  
1226 2016/07870-9 (GHG), 2018/00715-3 (CV) and the Conselho Nacional de  
1227 Desenvolvimento Científico e Tecnológico, Brazil (CNPq) grant numbers  
1228 301058/2019-9 and 404735/2018-5 (GHG) for financial support. IFD  
1229 acknowledges CICECO-Aveiro Institute of Materials (UIDB/50011/2020 &  
1230 UIDP/50011/2020) financed by national funds through the Foundation for  
1231 Science and Technology/MCTES, and the National NMR Network (PTNMR)  
1232 partially supported by Infrastructure Project N° 022161 (co-financed by FEDER  
1233 through COMPETE 2020, POCI and PORL and FCT through PIDDAC). AC,  
1234 RAG, CDO were supported by the Fundação para a Ciência e a Tecnologia  
1235 (FCT) (PTDC/MED-GEN/28778/2017, UIDB/50026/2020 and  
1236 UIDP/50026/2020). Additional support was provided by the Northern Portugal  
1237 Regional Operational Programme (NORTE 2020), under the Portugal 2020  
1238 Partnership Agreement, through the European Regional Development Fund  
1239 (ERDF) (NORTE-01-0145-FEDER-000013 and NORTE-01-0145-FEDER-  
1240 000023), the European Union's Horizon 2020 research and innovation  
1241 programme under grant agreement no. 847507, and the "la Caixa" Foundation  
1242 (ID 100010434) and FCT under the agreement LCF/PR/HP17/52190003.

1243 Individual support was provided by FCT (SFRH/BD/141127/2018 to CDO, and  
1244 CEECIND/03628/2017 to AC). This study was financed in part by the  
1245 Coordenação de Aperfeiçoamento de Pessoal de Nível Superior - Brasil  
1246 (CAPES) - Finance Code 001 (JHC scholarship). SSWW was supported by  
1247 Pasteur-Roux-Cantarini fellowship. JLS and AR are supported by the Howard  
1248 Hughes Medical Institute through the James H. Gilliam Fellowships for  
1249 Advanced Study program; AR is additionally supported by the National  
1250 Institutes of Health / National Institute of Allergy and Infectious Diseases  
1251 (1R56AI146096-01A1).

1252

## 1253 **Figure legends**

1254 **Figure 1. Acetate metabolism in *A. fumigatus*.** **A.** One- and two-dimensional  
1255 (1D, 2D) NMR (nuclear magnetic resonance) analysis of  $^{13}\text{C}_2$ -labelled acetate  
1256 incorporation and metabolism: (top) Expansion of 1D  $^1\text{H}$  NMR spectra of fungal  
1257 cell extracts showing the increase in acetate carbon satellite peaks upon culture  
1258 of *A. fumigatus* in  $^{13}\text{C}_2$ -acetate-containing medium; (bottom)  $^{13}\text{C}/^{12}\text{C}$  ratios for  
1259 metabolites that incorporated  $^{13}\text{C}$ -derived from acetate, as determined through  
1260 integration of  $^1\text{H}$ - $^{13}\text{C}$  HSQC (heteronuclear single quantum coherence) spectra  
1261 recorded for extracts of fungal cells grown for 5 and 15 min in medium  
1262 containing  $^{13}\text{C}_2$ -acetate in comparison to non-labelled control cultures. Standard  
1263 deviations represent the average of biological triplicates. **B-D.** The transcription  
1264 factor FacB is essential for growth in the presence of acetate. Strains were  
1265 grown for 5 days (B, C) or 3 days (D) in either solid (B, C) or liquid (D) minimal  
1266 medium supplemented with 1% w/v glucose (gluc, B, D), 0.5% w/v (B) or 1%

1267 w/v (B, D) acetate before radial diameter (C) or fungal dryweight (D) was  
1268 measured. To ensure homologous integration of *facB* in the complementation  
1269 strain, strains were grown in the presence of pyrithiamine (PT, *facB* was re-  
1270 introduced into the  $\Delta facB$  strain using the PT-resistant marker gene) and  
1271 hygromycin (HM, *facB* was deleted using the HM resistance marker gene) (B,  
1272 C). Plate pictures (B) are representative for the average radial diameter shown  
1273 in (C). Standard deviations represent the average of 3 biological replicates with  
1274 \*\*\**p*-value < 0.0001 in a 2-way multiple comparisons ANOVA test, comparing  
1275 the *facB* deletion strain to the WT strain.

1276 **Figure 2. FacB regulates acetate metabolism. A.** Heat map depicting log<sub>2</sub>FC  
1277 (fold changes) from the RNA-sequencing data of genes encoding enzymes  
1278 required for acetate metabolism in the wild-type (WT) and  $\Delta facB$  strains in the  
1279 presence of 0.1% w/v or 1% w/v acetate after 0.5 h and 6 h. The log<sub>2</sub>FC for the  
1280 WT strain is based on the comparison of gene expression between the WT  
1281 strain grown in fructose-rich medium and after transfer to acetate-rich medium;  
1282 whereas log<sub>2</sub>FC for the  $\Delta facB$  strain is from the comparison between the WT  
1283 and *facB* deletion strain for each acetate condition. **B.** Validation of RNA-  
1284 sequencing data by qRT-PCR shows that FacB is required for the  
1285 transcriptional expression of genes encoding enzymes involved in acetate  
1286 metabolism. Strains were first grown in minimal medium (MM) supplemented  
1287 with fructose before mycelia were transferred to acetate-containing MM, RNA  
1288 was extracted and reverse-transcribed to cDNA and qRT-PCR was run on  
1289 genes *facA*, Afu1g12340, Afu6g14100 and *acuD*. Gene expressions were  
1290 normalised by  $\beta$ -tubulin. **C.** Results of Pearson Correlation Analysis between  
1291 the RNA-sequencing and qRT-PCR datasets for 4 genes encoding enzymes

1292 involved in acetate metabolism. Gene fold-change values were used for the  
1293 analysis, which was carried out in Prism Graphpad (\* $p$ -value < 0.05, \*\* $p$ -value <  
1294 0.005). **D.** *FacB* is required for acetyl-CoA synthetase (ACS) and isocitrate  
1295 lyase (ICL) activities. Strains were grown in fructose-rich MM for 24 h, before  
1296 mycelia were transferred to MM containing 1% w/v acetate for 0.5 h, 6 h and 22  
1297 h and total cellular proteins were extracted and enzyme activities were  
1298 measured. Standard deviations represent the average of 3 biological replicates  
1299 with \*\* $p$ -value < 0.001, \*\*\* $p$ -value < 0.0001 in a 2-way multiple comparisons  
1300 ANOVA test when comparing the *facB* deletion strain to the WT strain.

1301 **Figure 3. Acetate utilisation is subject to carbon catabolite repression**

1302 **(CCR). A. – B.** Expression of genes *facA*, *Afu1g12340*, *Afu6g14100* and *acuD*,  
1303 as determined by qRT-PCR, in strains grown for 24 h in minimal medium (MM)  
1304 supplemented with fructose and then transferred for 0.5 h to MM supplemented  
1305 with either acetate or acetate and glucose. Graphs in panel A. show results  
1306 from growth in 12.2 mM for each carbon source whereas graphs in panel B.  
1307 show results from growth in 122 mM for each carbon source. **C.** Activities of  
1308 acetyl-CoA synthetase (ACS) and isocitrate lyase (ICL) in strains incubated for  
1309 0.5 h, 6 h and 22 h in MM supplemented with 122 mM acetate and 122 mM  
1310 glucose. Strains were first grown for 24 h in fructose MM before mycelia were  
1311 transferred to acetate and glucose-containing MM. **D.** Percentage of residual  
1312 glucose in supernatants of strains grown for 24 h in fructose-rich MM and after  
1313 transfer to glucose MM for a total time period of 22 h. Standard deviations  
1314 represent the average of 3 biological replicates with \* $p$ -value < 0.01, \*\* $p$ -value <  
1315 0.001, \*\*\* $p$ -value < 0.0001 in a 2-way multiple comparisons ANOVA test when

1316 comparing the *facB* deletion strain to the WT strain or when comparing the WT  
1317 strain in two conditions (indicated by a line).

1318 **Figure 4. The extracellular carbon source affects the levels of secreted**  
1319 **secondary metabolites (SMs). A, B.** Heat map of the log<sub>2</sub> fold-change (FC),  
1320 as determined by RNA seq, of genes predicted to encode enzymes required for  
1321 SM biosynthesis in the wild-type (WT) and  $\Delta facB$  strains when grown for 0.5 h  
1322 and 6 h in the presence of 0.1% w/v or 1% w/v acetate or when comparing gene  
1323 expression in the WT strain in the presence of different acetate concentrations  
1324 and in the presence of fructose (control, CTRL condition). In grey, are genes  
1325 that did not show a significant FC. **C.** Quantities of identified SMs, as  
1326 determined by high performance liquid chromatography (HPLC), in the WT and  
1327  $\Delta facB$  strains when grown for 24 h in minimal medium supplemented with 0.1%  
1328 w/v (LGLU = low glucose; LACET = low acetate) or 1% w/v glucose (HGLU =  
1329 high glucose; HACET = high acetate) or acetate. SM quantities were  
1330 normalised by fungal dry weight (DW). Standard deviations represent the  
1331 average of 4 biological replicates with \**p*-value < 0.01, \*\**p*-value < 0.001, \*\*\**p*-  
1332 value < 0.0001 in a 2-way multiple comparisons ANOVA test.

1333 **Figure 5. Acetate utilisation impacts cell wall polysaccharide content,**  
1334 **oxidative stress, caspofungin and immune cell resistance in *A. fumigatus*.**  
1335 **A, B.** Percentage of total (A.) and individual (B.) sugars identified in the alkali-  
1336 insoluble (AI) and alkali-soluble (AS) fractions by gas liquid chromatography of  
1337 the WT strain when grown for 24 h in MM supplemented with glucose and  
1338 acetate. Standard deviations represent the average of 4 biological replicates  
1339 and \*\*\**p*-value < 0.0001 in a 2-way multiple comparisons ANOVA test when  
1340 comparing the acetate condition to the glucose condition. **C.** The wild-type (WT)

1341 strain was grown from  $10^5$  spores for 5 days on glucose (GMM) or acetate  
1342 minimal medium (AMM) supplemented with different concentrations of oxidative  
1343 stress-inducing compounds. Colony diameters were measured and normalised  
1344 by the control condition and expressed as percentage of growth in comparison  
1345 to the control condition. **D.** As described in C., with the exception that GMM or  
1346 AMM was supplemented with increasing concentrations of caspofungin.  
1347 Standard deviations represent the average of 3 biological replicates and \*\**p*-  
1348 value < 0.001, \*\*\**p*-value < 0.0001 in a 2-way multiple comparisons ANOVA test  
1349 comparing the acetate condition to the glucose condition. **E.** The WT strain was  
1350 pre-grown for 8 h or 13 h in GMM or AMM respectively, before hyphae were  
1351 incubated with different concentrations of human neutrophils for 1 h.  
1352 Subsequently, cells were lysed and hyphal viability was assessed via an MTT  
1353 assay and calculated. Standard deviations represent the average of 3 biological  
1354 replicates and \**p*-value < 0.05 in a one-tailed t-test, comparing the acetate  
1355 condition to the glucose condition. **F, G.** Murine bone marrow-derived  
1356 macrophage (BMDM) phagocytosis (F.) and killing (G.) of *A. fumigatus* conidia.  
1357 BMDMs were incubated with fungal conidia before they were stained with  
1358 calcofluor white and the percentage of phagocytosed conidia was assessed by  
1359 microscopy and calculated. To assess fungal viability, conidia-macrophage  
1360 mixtures were lysed, diluted and inoculated on plates containing complete  
1361 medium before colony forming units (CFU) were assessed and percentage of  
1362 viability calculated. Standard deviations represent the average of 3 biological  
1363 replicates and \**p*-value < 0.05, \*\**p*-value < 0.005 in a paired t-test.

1364 **Figure 6. *FacB* is crucial for virulence in both insect and murine models of**  
1365 **invasive aspergillosis.** Survival curves (n=10/strain and n=5 for control) of



1366 *Galleria melonella* (A.) and mice (B.) infected with the respective *A. fumigatus*  
1367 strains. Phosphate buffered saline (PBS) without conidia was given as a  
1368 negative control. Indicated P-values are based on the Log-rank, Mantel-Cox  
1369 and Gehan-Breslow-Wilcoxon tests comparing the *facB* deletion strain to the  
1370 WT and *facB* complemented strains. Fungal burden in murine lungs after 3 (C.)  
1371 and 7 (D.) days post-infection (p.i.) with the different *A. fumigatus* strains.  
1372 Murine lungs were excised, ruptured and re-suspended, before dilutions were  
1373 prepared that were incubated on plates containing complete medium. Fungal  
1374 growth was assessed by counting the colony forming units (CFU) on the plates  
1375 for each dilution. Inflammation in murine lungs after 3 (E.) days post-infection  
1376 (p.i.) with the different *A. fumigatus* strains. Murine lungs were excised and  
1377 slides of lung sections were prepared. To quantify lung inflammation of infected  
1378 animals, inflamed areas on slide images were analysed using the thresholding  
1379 tool in ImageJ software. Standard deviations represent the average of three  
1380 biological replicates (lungs from different mice) with \**p*-value < 0.01, \*\**p*-value <  
1381 0.001, \*\*\**p*-value < 0.0001 in a 2-way multiple comparisons ANOVA test. G.  
1382 Histopathology of mice infected with the different *A. fumigatus* strains. Lungs  
1383 were excised at 3 days post-infection (p.i.) before lung sections were prepared  
1384 and stained with HE (Hematoxylin and Eosin) or with Grocott's methenamine  
1385 silver (GMS).

1386

1387

1388

1389 **Table 1.** Number of differentially expressed genes (DEGs,  $-1 < \log_2FC < 1$ ) identified by  
1390 RNA-sequencing in the wild-type and  $\Delta facB$  strains when grown for 0.5 h or 6 h in  
1391 minimal medium supplemented with 0.1 or 1.0 % w/v acetate.

| <b>Comparison acetate versus fructose in the wild-type strain</b> |                           |                             |              |
|-------------------------------------------------------------------|---------------------------|-----------------------------|--------------|
| <b>Condition</b>                                                  | <b>Up-regulated genes</b> | <b>Down-regulated genes</b> | <b>Total</b> |
| 0.1% acetate 0.5 h                                                | 794 (54.7%)               | 658 (45.3%)                 | 1452         |
| 0.1% acetate 6.0 h                                                | 1698 (54%)                | 1445 (46%)                  | 3143         |
| 1% acetate 0.5 h                                                  | 1107 (47.8%)              | 1211 (52.2%)                | 2318         |
| 1% acetate 6.0 h                                                  | 882 (66.3%)               | 448 (33.7%)                 | 1330         |
| <b>Comparison <math>\Delta facB</math> versus wild-type</b>       |                           |                             |              |
| 0.1% acetate 0.5 h                                                | 34 (18.9%)                | 145 (81.1%)                 | 179          |
| 0.1% acetate 6.0 h                                                | 710 (54.3%)               | 596 (45.7%)                 | 1306         |
| 1% acetate 0.5 h                                                  | 54 (28.6%)                | 134 (71.4%)                 | 188          |
| 1% acetate 6.0 h                                                  | 482 (71.0%)               | 198 (29%)                   | 678          |

1392

1393

1394

1395

1396

1397

1398

1399 **Table 2.** Minimal inhibitory concentrations (MIC) of different antifungal drugs ( $\mu\text{g/ml}$ )  
1400 on the *A. fumigatus* WT strain when grown in RPMI, glucose (GMM) and acetate  
1401 minimal medium (AMM). Shown is the average and standard deviations of three  
1402 independent repeats with \*  $p < 0.05$  in a two-way ANOVA test comparing AMM to  
1403 RPMI and GMM.

| Medium | Amphotericin B    | Voriconazole    | Itraconazole    | Posaconazole    |
|--------|-------------------|-----------------|-----------------|-----------------|
| RPMI   | $3.33 \pm 1.15$   | $0.25 \pm 0.00$ | $0.42 \pm 0.14$ | $0.67 \pm 0.29$ |
| GMM    | $3.33 \pm 1.15$   | $0.33 \pm 0.14$ | $0.50 \pm 0.00$ | $1.00 \pm 0.00$ |
| AMM    | $1.17^* \pm 0.76$ | $0.21 \pm 0.07$ | $0.33 \pm 0.14$ | $0.67 \pm 0.29$ |

1404

1405

1406

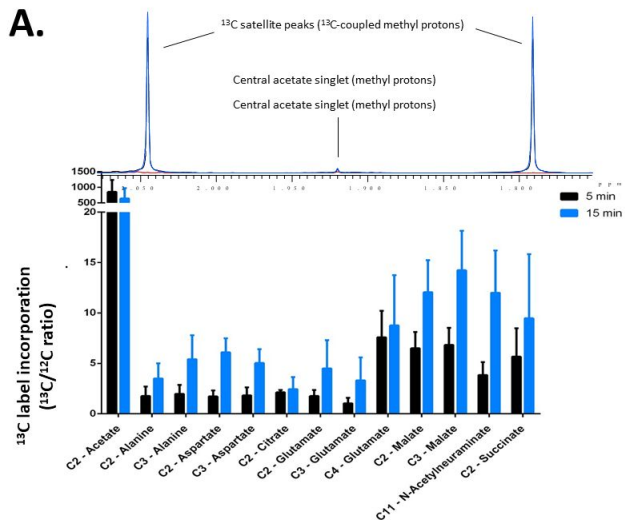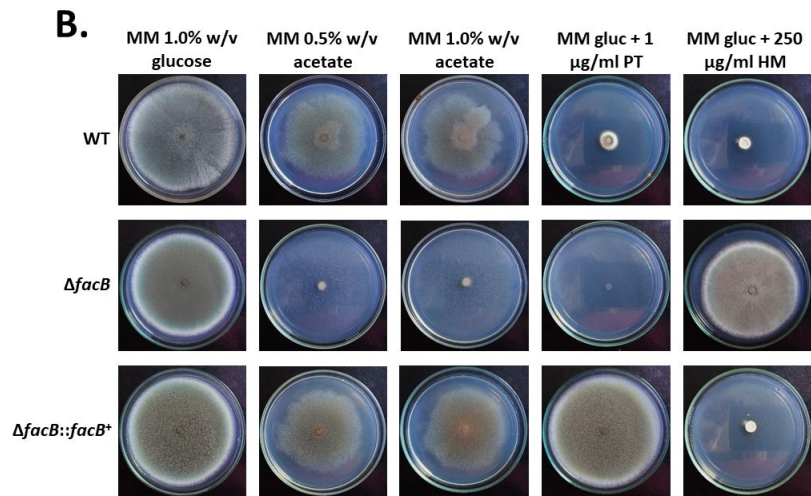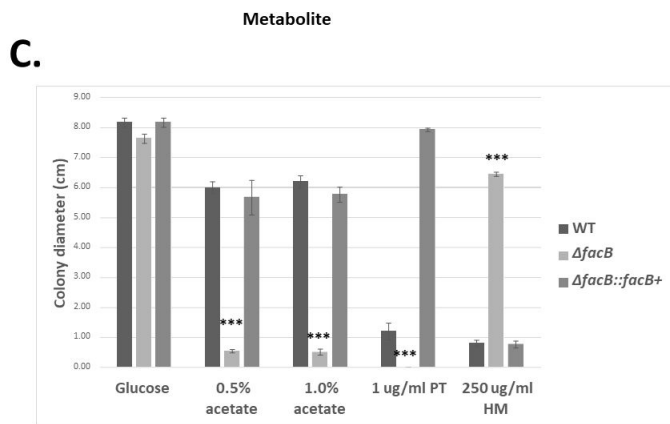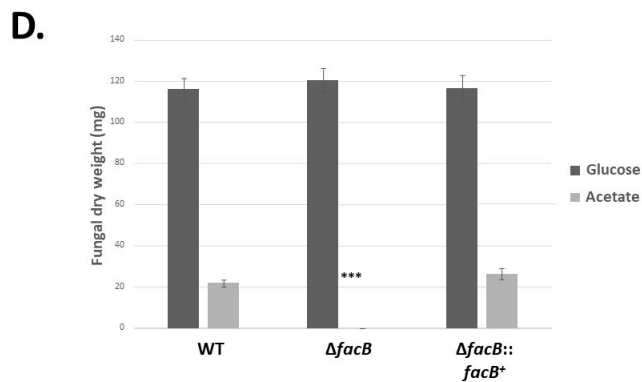

A.

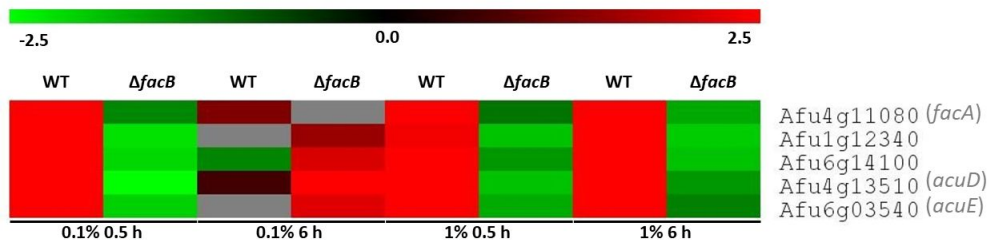

Afu4g11080 (*facA*)  
 Afu1g12340  
 Afu6g14100  
 Afu4g13510 (*acuD*)  
 Afu6g03540 (*acuE*)

B.

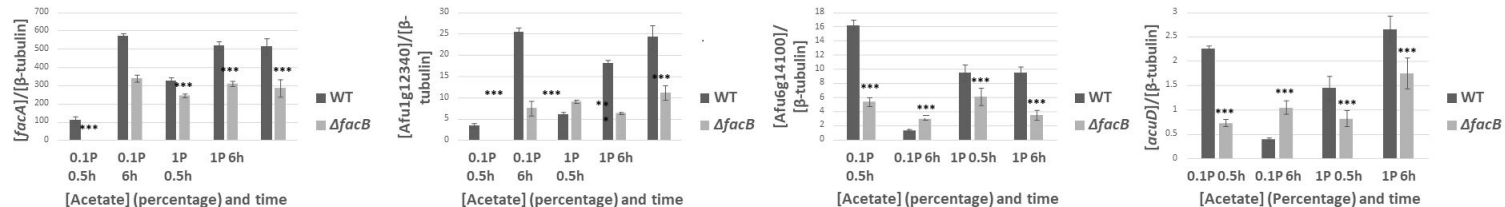

C.

|                                              | Pearson Correlation Analysis |                  |                  |                  |
|----------------------------------------------|------------------------------|------------------|------------------|------------------|
|                                              | <i>facA</i>                  | AFUA_1G12340     | AFUA_6G14100     | <i>acuD</i>      |
| Number of conditions                         | 3                            | 4                | 4                | 4                |
| Pearson r                                    | 0.9911                       | 0.9758           | 0.9777           | 0.9824           |
| 95% confidence interval                      | 0.6311 to 0.9998             | 0.2354 to 0.9995 | 0.2748 to 0.9996 | 0.3821 to 0.9996 |
| P value (two-tailed)                         | 0,0089                       | 0,0242           | 0,0223           | 0,0176           |
| P value summary                              | **                           | *                | *                | *                |
| Is the correlation significant? (alpha=0.05) | Yes                          | Yes              | Yes              | Yes              |
| R squared                                    | 0,9822                       | 0,9521           | 0,9559           | 0,9652           |

D.

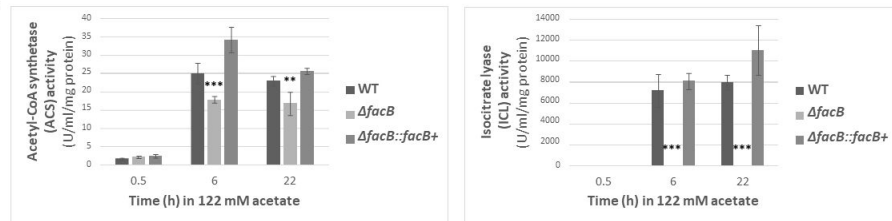

A.

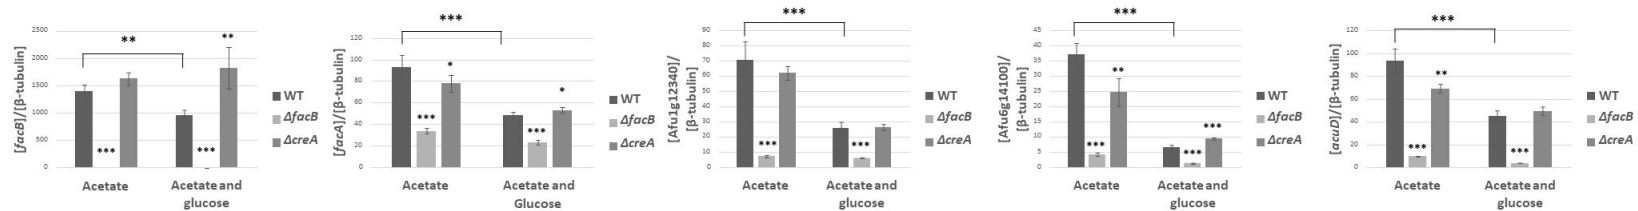

B.

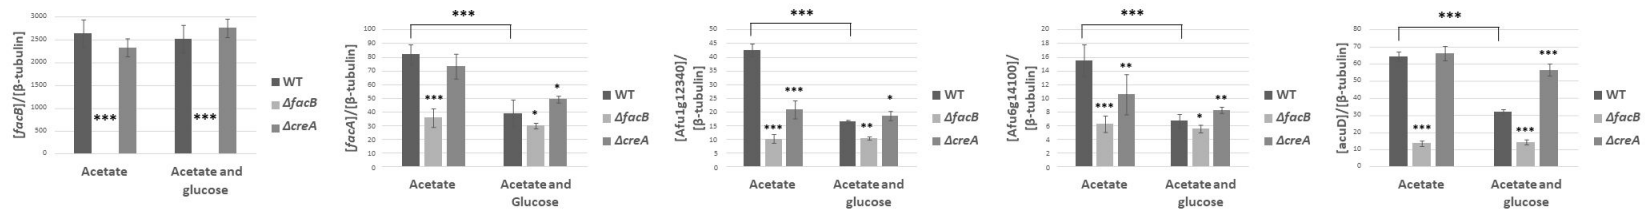

C.

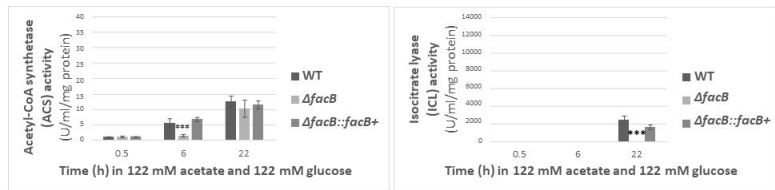

D.

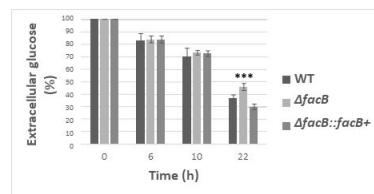

A.

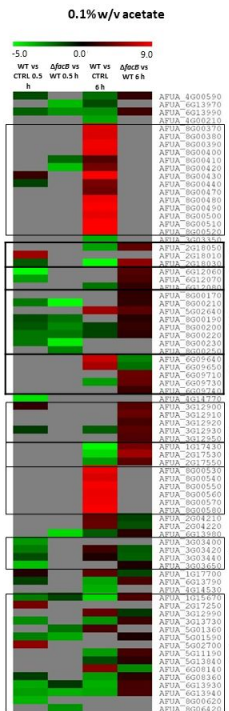

B.

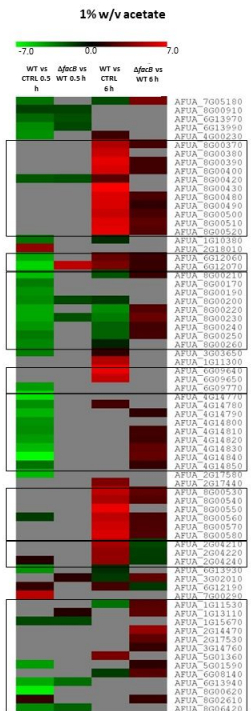

C.

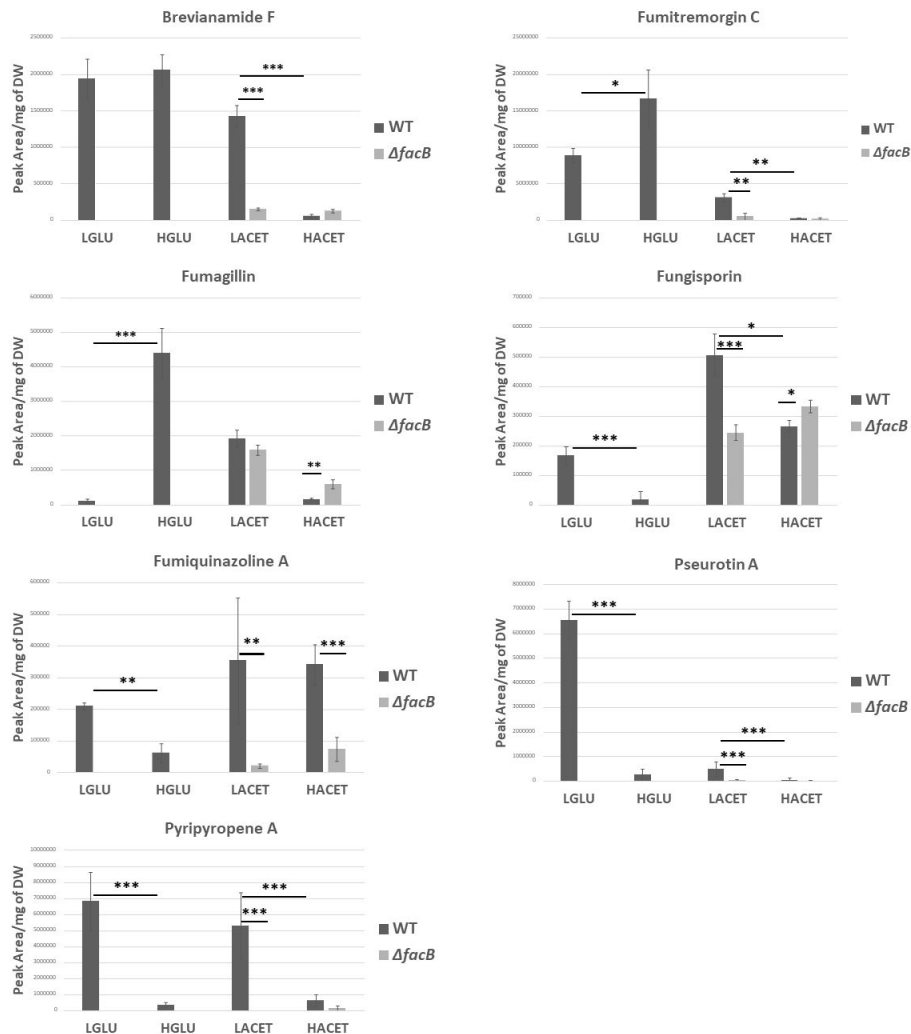

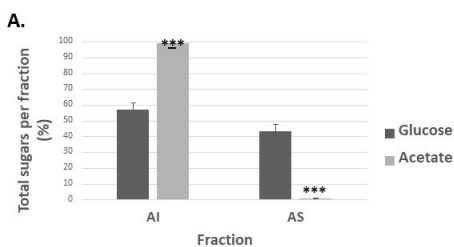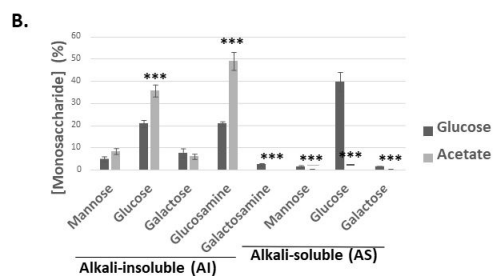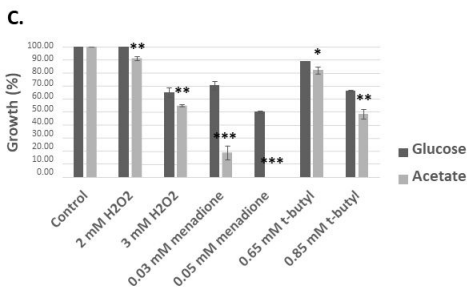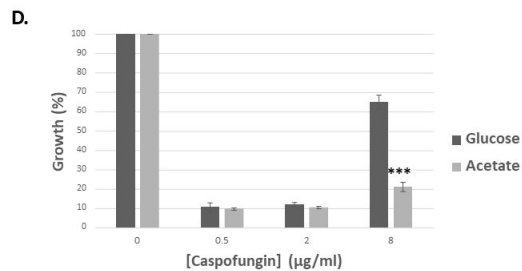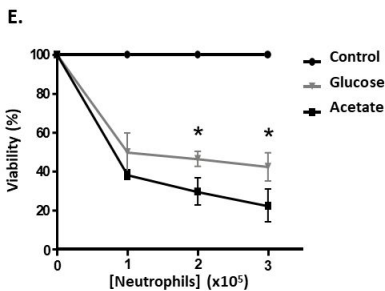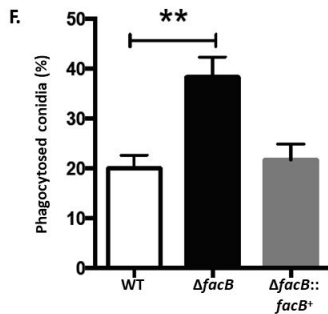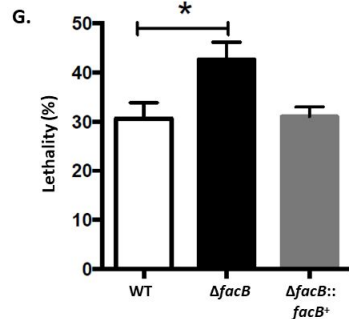



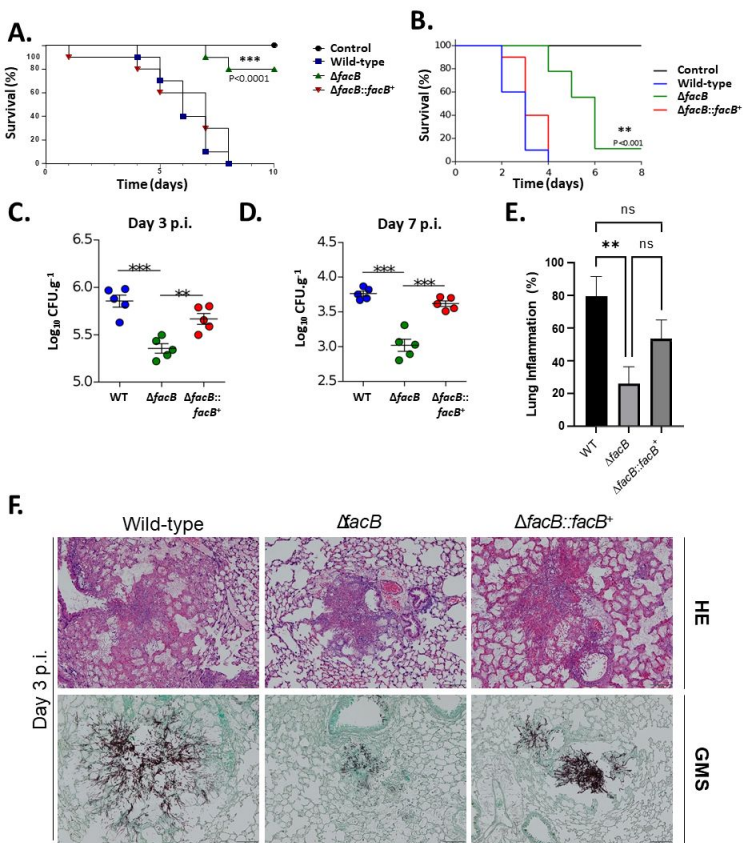

Source: https://www.biorxiv.org/content/10.1101/2021.06.09.447827v1.full.pdf
